# Supplementary material for: Anti-inflammatory, antiallergic and COVID-19 protease inhibitory activities of phytochemicals from the Jordanian hawksbeard: identification, structure–activity relationships, molecular modeling and impact on its folk medicinal uses
Source: Royal Society of Chemistry journal article supplement (doi:10.1039/d0ra04876c), 2020-01-01
Supplement: d0ra04876c1.pdf [file d0ra04876c1.pdf]

## Supplementary Material for

### **Anti-inflammatory, antiallergic and COVID-19 protease inhibitory activities of phytochemicals from the Jordanian hawksbeard: Identification, structure-activity relationships, molecular modeling and impact on its folk medicinal uses**

Sherif S. Ebada<sup>a,b,c,\*</sup>, Nariman A. Al-Jawabri<sup>b</sup>, Fadia S. Youssef<sup>a,c</sup>, Dina Elkashef<sup>a,d</sup>, Tim-Oliver Knedel<sup>e</sup>, Amgad Albohy<sup>f</sup>, Michal Korinek<sup>g,h,i</sup>, Tsong-Long Hwang<sup>h,i,j</sup>, Bing-Hung Chen<sup>g,k,l</sup>, Guan-Hua Lin<sup>m</sup>, Chia-Yi Lin<sup>m</sup>, Sa'ed M. Aldalaien<sup>b</sup>, Ahmad M. Disi<sup>n</sup>, Christoph Janiak<sup>e</sup>, Peter Proksch<sup>a,\*</sup>

<sup>a</sup> Institute of Pharmaceutical Biology and Biotechnology, Heinrich-Heine University, D-40225 Düsseldorf, Germany, <sup>b</sup> Department of Pharmaceutical Chemistry, Faculty of Pharmacy, Mu'tah University, 61710 Al-Karak, Jordan, <sup>c</sup> Department of Pharmacognosy, Faculty of Pharmacy, Ain-Shams University, Abbasia, 11566 Cairo, Egypt, <sup>d</sup> Department of Pharmacognosy, Faculty of Pharmacy, Minia University, 61519 Minia, Egypt, <sup>e</sup> Institut für Anorganische Chemie und Strukturchemie, Heinrich-Heine-Universität, D-40204 Düsseldorf, Germany, <sup>f</sup> Department of Pharmaceutical Chemistry, Faculty of Pharmacy, The British University in Egypt (BUE), Al-Sherouk City, Cairo-Suez Desert Road, 11837, Egypt, <sup>g</sup> Graduate Institute of Natural Products, College of Pharmacy, Kaohsiung Medical University, Kaohsiung, Taiwan, <sup>h</sup> Department of Biotechnology, College of Life Science, Kaohsiung Medical University, Kaohsiung, Taiwan, <sup>i</sup> Graduate Institute of Natural Products, College of Medicine, Chang Gung University, Taoyuan, Taiwan, <sup>j</sup> Research Center for Chinese Herbal Medicine, Research Center for Food and Cosmetic Safety, and Graduate Institute of Health Industry Technology, College of Human Ecology, Chang Gung University of Science and Technology, Taoyuan, Taiwan, <sup>k</sup> Department of Anesthesiology, Chang Gung Memorial Hospital, Taoyuan, Taiwan, <sup>l</sup> Department of Medical Research, Kaohsiung Medical University Hospital, Kaohsiung, Taiwan, <sup>m</sup> The Institute of Biomedical Sciences, National Sun Yat-sen University,

Kaohsiung, Taiwan, <sup>n</sup> Department of Basic Pharmaceutical Sciences, Faculty of Pharmacy, Al-Isra  
University, 11622 Amman, Jordan

\* Corresponding authors. Tel.: +49211-81-14163; Fax: +49211-81-11923

E-mail addresses: [ss\\_ebada@mutah.edu.jo](mailto:ss_ebada@mutah.edu.jo) or [sherif\\_elsayed@pharma.asu.edu.eg](mailto:sherif_elsayed@pharma.asu.edu.eg) (S.S. Ebada) and  
[Peter.Proksch@hhu.de](mailto:Peter.Proksch@hhu.de) (P. Proksch)

## ABSTRACT

On Wednesday 11<sup>th</sup> of March, 2020, the world health organization (WHO) announced novel coronavirus (COVID-19, also called SARS-CoV-2) as a pandemic. Due to the time shortage and the lack of either a vaccine and/or an effective treatment, many trials focused on testing natural products to find out potential lead candidates. In this field, an edible and a folk medicinal Jordanian plant *Crepis sancta* (Asteraceae) was selected for this study. Phytochemical investigation of its enriched polyphenolic extract afforded four eudesmane sesquiterpenes (**1-4**) together with (6*S*,9*R*)-roseoside (**5**) and five different methylated flavonols (**6-10**). Structure elucidation of isolated compounds was unambiguously determined based on HRESIMS, X-ray crystallography, exhaustive 1D and 2D NMR experiments. All isolated compounds were assessed for their *in vitro* anti-inflammatory, antiallergic and *in silico* COVID-19 main protease (M<sup>pro</sup>) inhibitor activities. Among the tested compounds, compounds **5-10** revealed potent anti-inflammatory, antiallergic and COVID-19 protease inhibitor activities. Chrysosplenetin (**10**) is considered as a promising anti-inflammatory and antiallergic lead structure adding to the phytotherapeutic pipeline. Moreover, its inhibitory activity against SARS-CoV-2 M<sup>pro</sup>, supported by docking and molecular dynamic studies, strengthens its potential as a lead structure paving the way toward finding out a natural remedy for the treatment and/or controlling the current COVID-19 pandemic.

*Keywords:* Hawksbeard; anti-inflammatory; antiallergic; COVID-19 protease; polyphenolics; eudesmane sesquiterpenes.

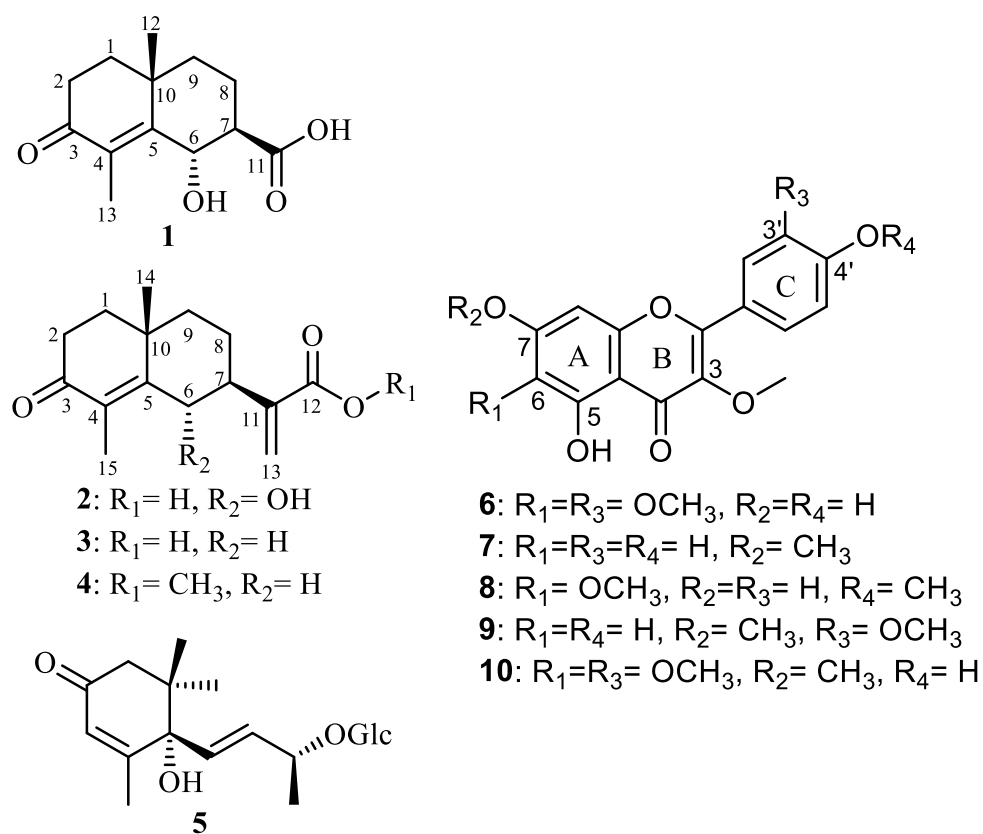

Figure S1. Chemical structures of **1-10**.

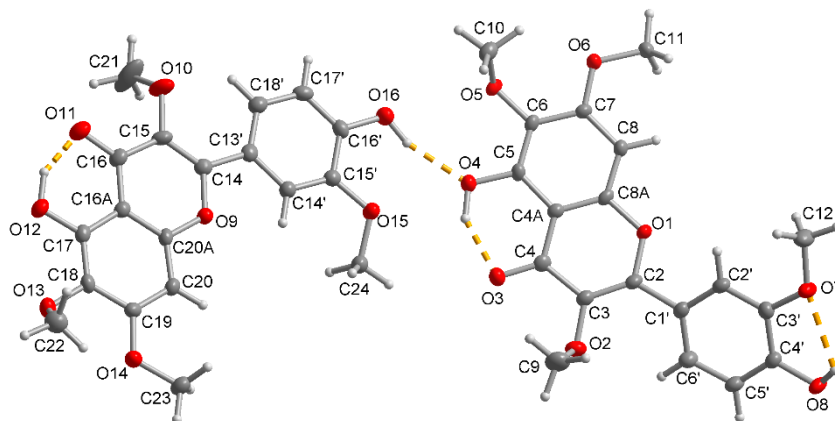

Figure S2. 3D X-ray structure of chrysosplenetin (**10**).

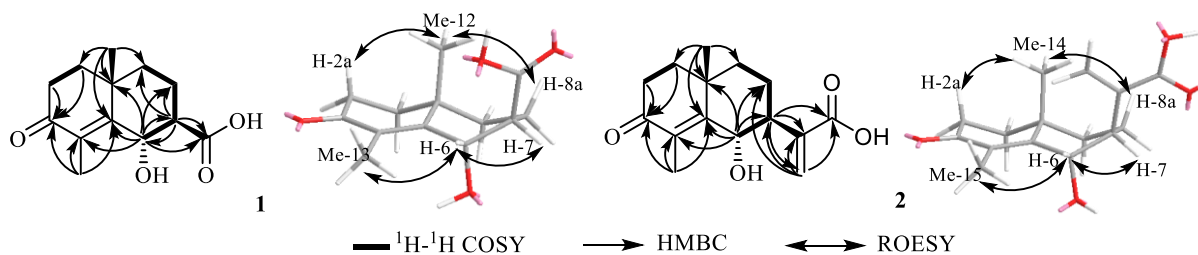

Figure S3. Key  $^1H$ - $^1H$  COSY, HMBC and ROESY correlations of **1** and **2**.

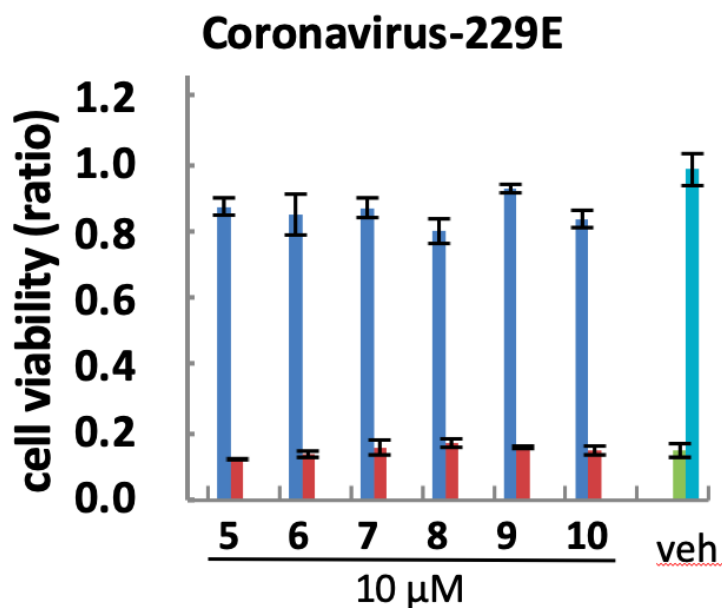

Figure S4. Human coronavirus 229E (HCoV-229E) protective activity. The cells infected by HCoV-229E were treated with the compounds 5 to 10 (red) or vehicle (green), their difference would indicate protective effects against HCoV-229E infection. The uninfected cells were treated with the compounds 5 to 10 (dark blue) or vehicle only (cyan), serving as control for toxicity of the samples and vehicle. Veh; vehicle.

Table S1. NMR data of **1** and **2** in methanol- $d_4$  ( $^1\text{H}$  at 600 MHz and  $^{13}\text{C}$  at 150 MHz).

| pos. | <b>1</b>                                                  |                                     | <b>2</b>                                                  |                                     |
|------|-----------------------------------------------------------|-------------------------------------|-----------------------------------------------------------|-------------------------------------|
|      | $\delta_{\text{H}}$ ( $J$ in Hz)                          | $\delta_{\text{C}}$ , $^{a,b}$ type | $\delta_{\text{H}}$ ( $J$ in Hz)                          | $\delta_{\text{C}}$ , $^{a,b}$ type |
| 1    | 1.72 (m)<br>1.83 (m)                                      | 39.8, CH <sub>2</sub>               | 1.72 (m)<br>1.79 (m)                                      | 37.9, CH <sub>2</sub>               |
| 2    | 2.66 (ddd, 17.4, 15.2, 5.2)<br>2.38 (ddd, 17.4, 4.5, 2.5) | 34.6, CH <sub>2</sub>               | 2.77 (ddd, 18.2, 14.7, 5.6)<br>2.47 (ddd, 18.2, 5.2, 2.0) | 34.6, CH <sub>2</sub>               |
| 3    |                                                           | 202.5, CO                           |                                                           | 201.0, CO                           |
| 4    |                                                           | 132.0, C                            |                                                           | 137.3, C                            |
| 5    |                                                           | 161.2, C                            |                                                           | 154.3, C                            |
| 6    | 5.25 (d, 3.0)                                             | 67.6, CH                            | 5.52 (d, 6.5)                                             | 77.3, CH                            |
| 7    | 2.46 (dt, 12.9, 3.0)                                      | 49.0, CH                            | 3.29 (m)                                                  | 41.2, CH                            |
| 8    | 2.21 (ddd, 13.4, 12.9, 3.2)<br>1.74 (m)                   | 18.5, CH <sub>2</sub>               | 1.84 (m)<br>1.63 (m)                                      | 26.0, CH <sub>2</sub>               |
| 9    | 1.39 (dd, 13.3, 3.2)<br>1.70 (dd, 6.7, 3.0)               | 41.4, CH <sub>2</sub>               | 1.48 (m)<br>1.72 (ddq, 11.7, 5.5, 3.2, 1.9)               | 41.8, CH <sub>2</sub>               |
| 10   |                                                           | 36.1, C                             |                                                           | 35.6, C                             |
| 11   |                                                           | 176.8, CO                           |                                                           | 142.2, C                            |
| 12   | 1.42 (s)                                                  | 24.4, CH <sub>3</sub>               |                                                           | 172.2, CO                           |
| 13   | 1.87 (br s)                                               | 10.3, CH <sub>3</sub>               | a: 6.22 (d, 1.5)<br>b: 5.80 (d, 1.5)                      | 122.8, CH <sub>2</sub>              |
| 14   |                                                           |                                     | 1.26 (s)                                                  | 24.5, CH <sub>3</sub>               |
| 15   |                                                           |                                     | 1.88 (br s)                                               | 10.6, CH <sub>3</sub>               |

<sup>a</sup> Carbon type is determined from gHMBC data. <sup>b</sup> Shifts are assigned on the basis of gHMBC and gHMBC data.

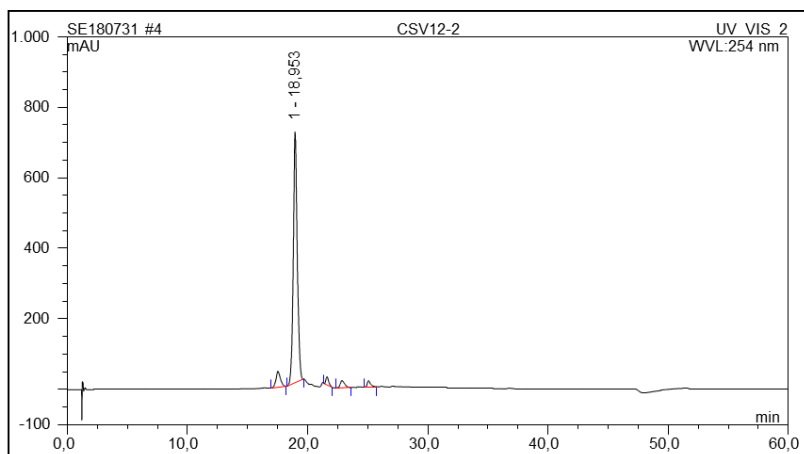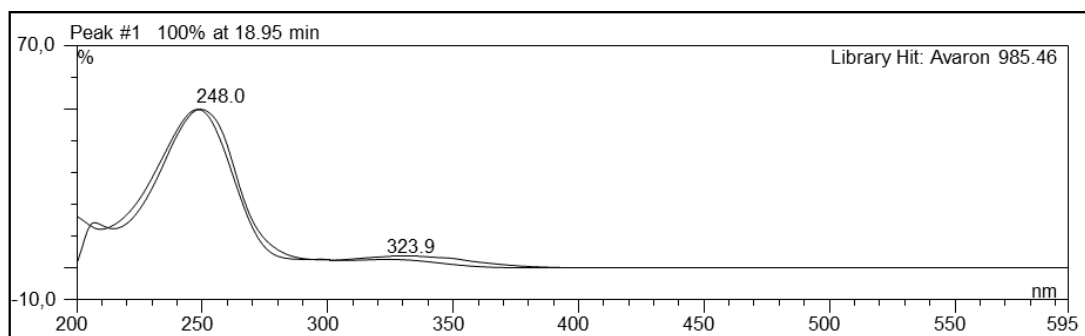

Figure S5. HPLC chromatogram of **1**

14 #392-434 RT: 7.93-8.42 AV: 21 NL: 1.03E6  
T: FTMS (1,1) + p ESI Full ms [120.00-2000.00]

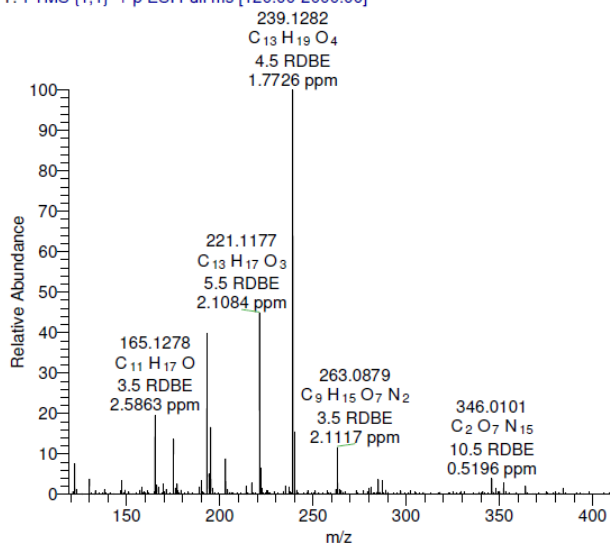

14 #370-429 RT: 7.58-8.33 AV: 30 NL: 5.00E6  
T: FTMS (1,2) - p ESI Full ms [120.00-2000.00]

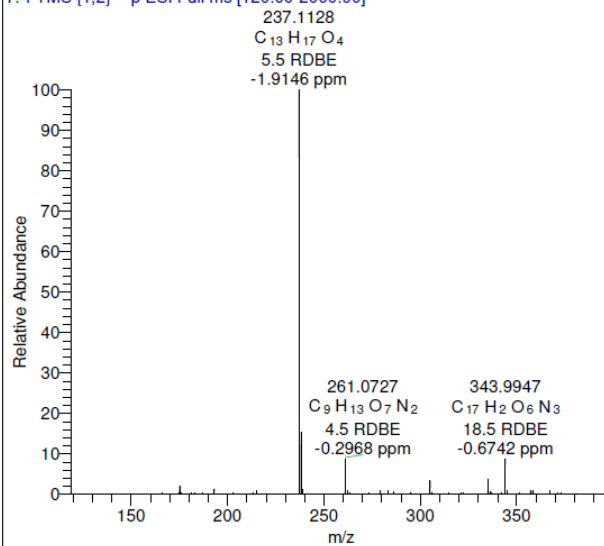

Figure S6. HRESIMS spectrum of **1**

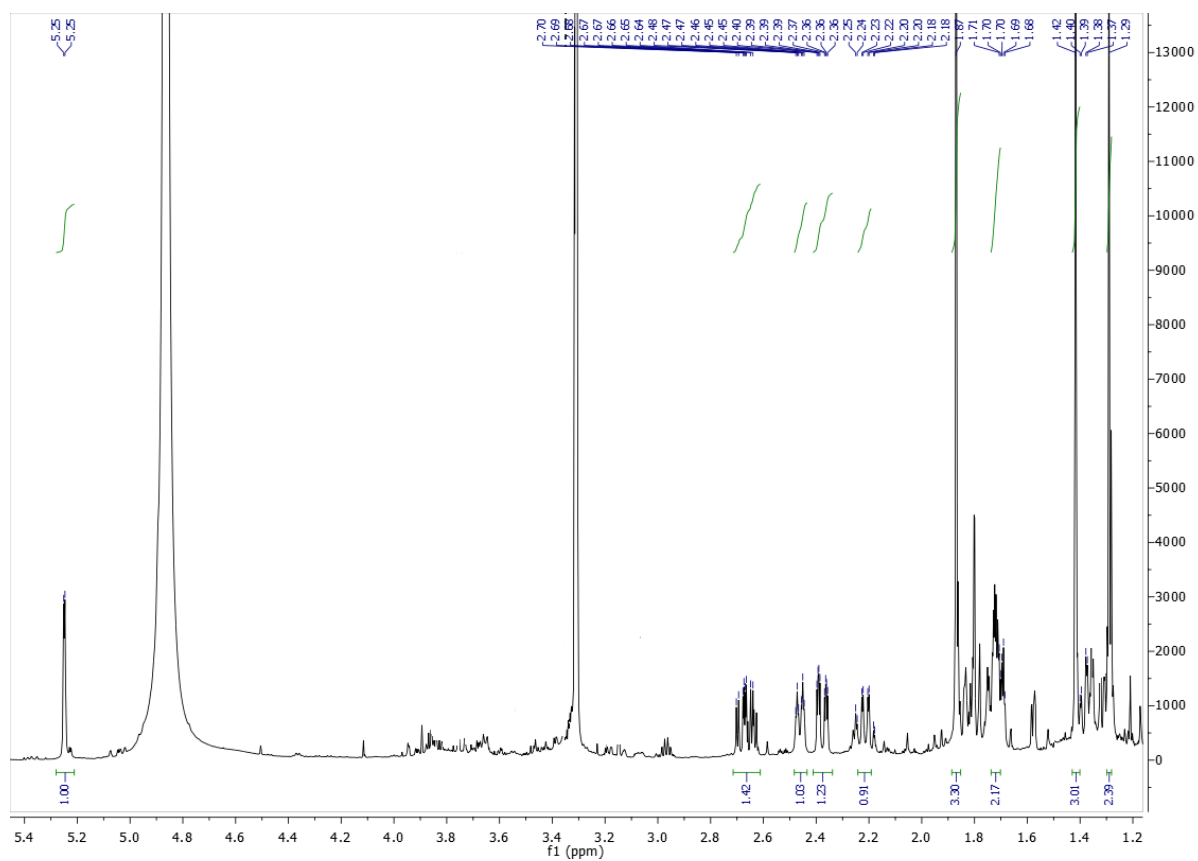

Figure S7.  $^1\text{H}$  NMR spectrum of **1** in methanol- $d_4$  at 600 MHz.

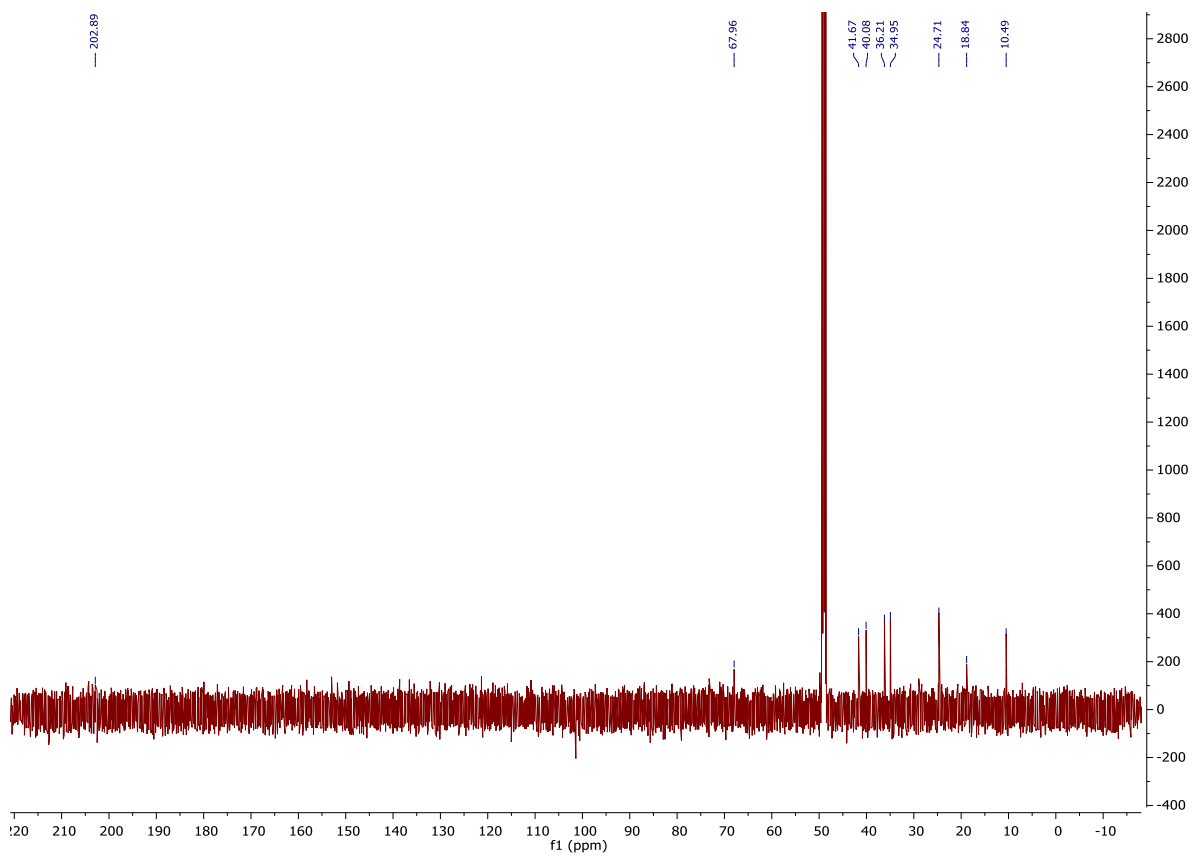

Figure S8.  $^{13}\text{C}$  NMR spectrum of **1** in methanol- $d_4$  at 600 MHz.

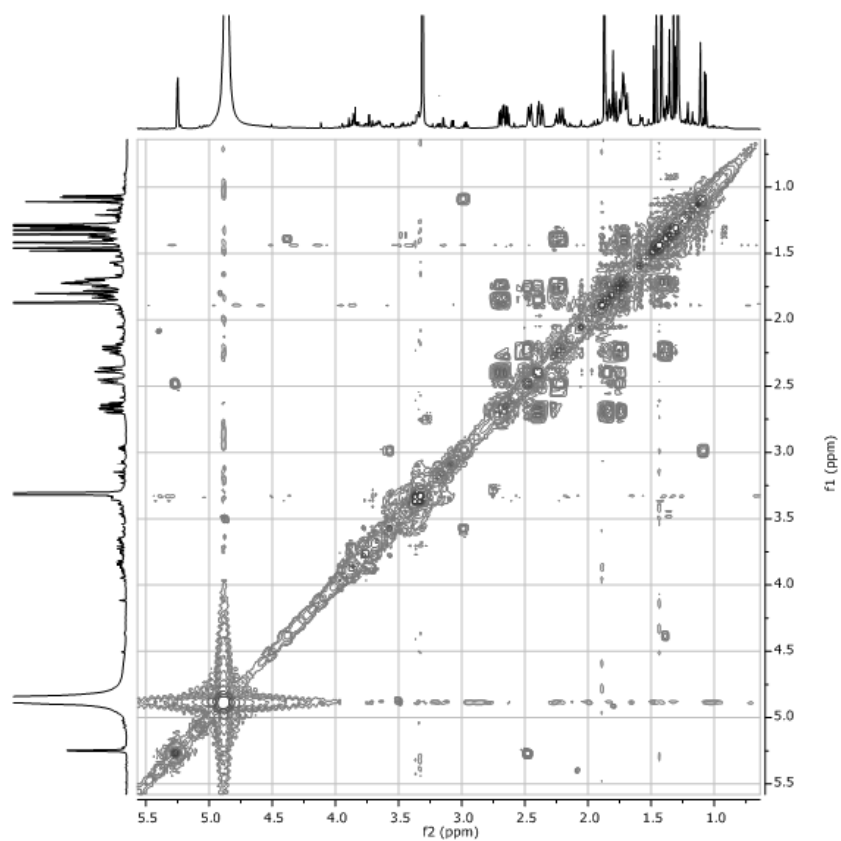

Figure S9.  $^1\text{H}$ - $^1\text{H}$  COSY spectrum of **1** in methanol- $d_4$  at 600 MHz.

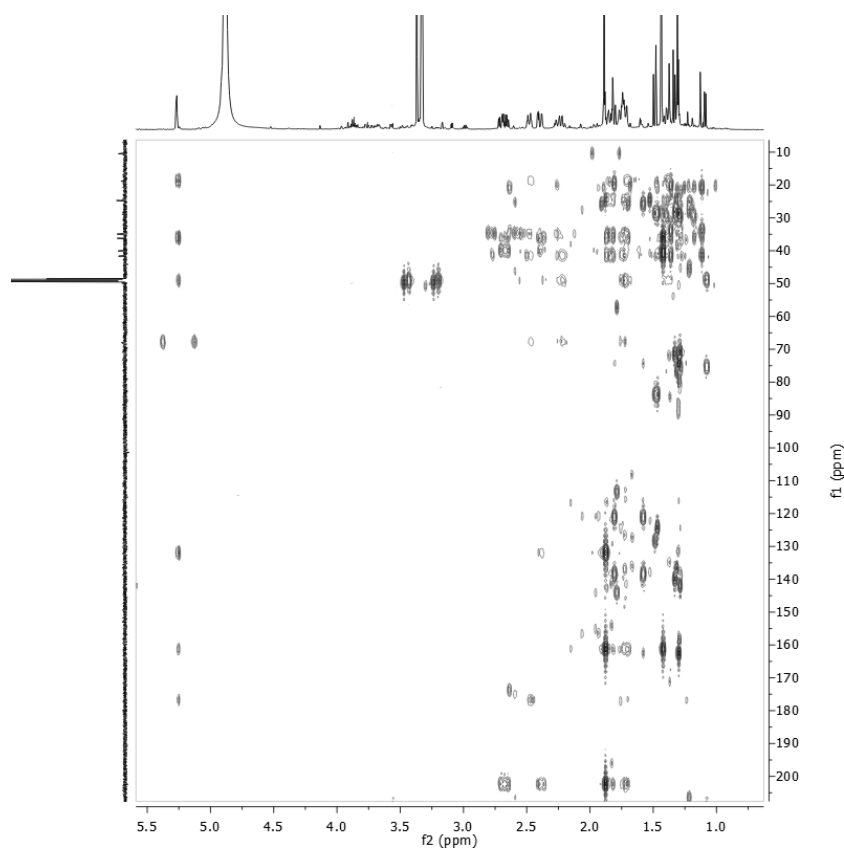

Figure S10.  $g\text{HMBC}$  spectrum of **1** in methanol- $d_4$  at 600 MHz.



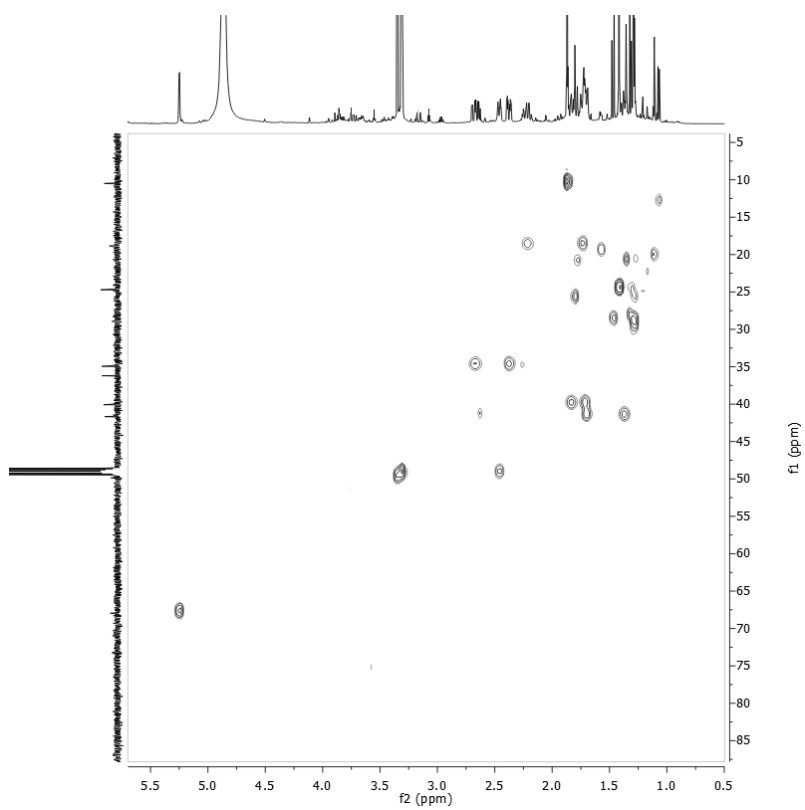

Figure S11. gHMQC spectrum of **1** in methanol- $d_4$  at 600 MHz.

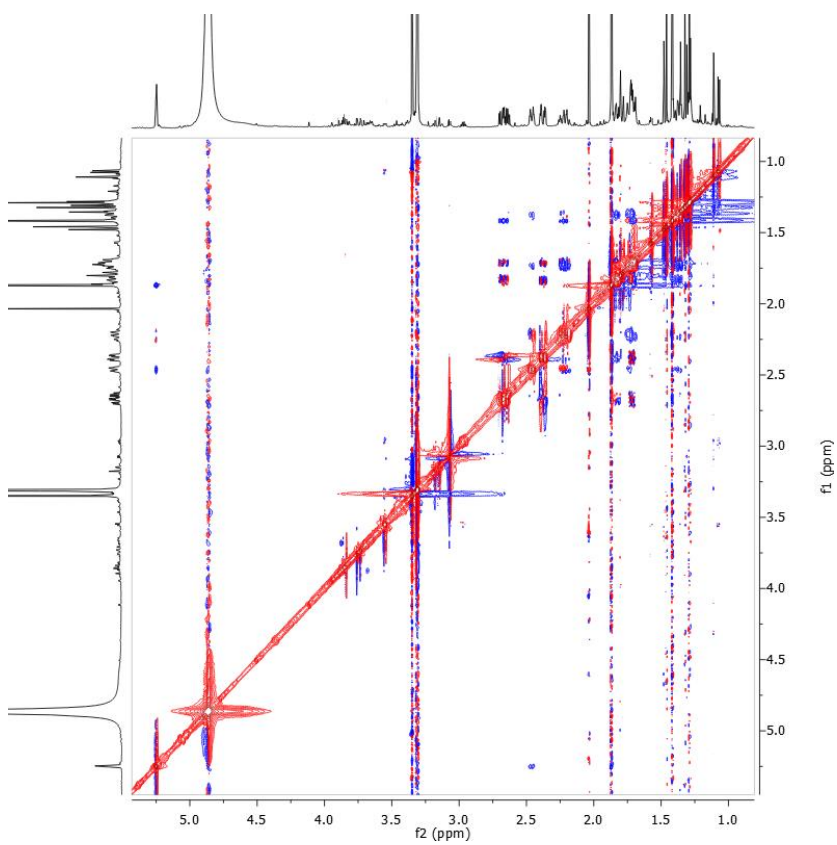

Figure S12. ROESY spectrum of **1** in methanol- $d_4$  at 600 MHz.

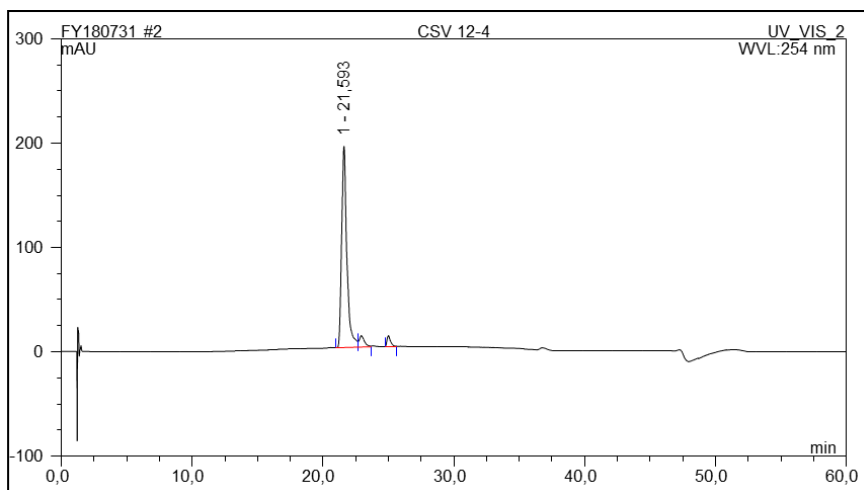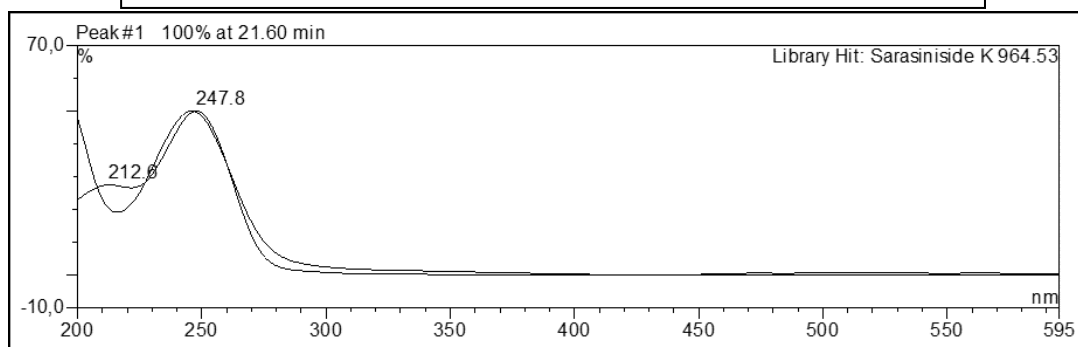

Figure S13. HPLC chromatogram of **2**

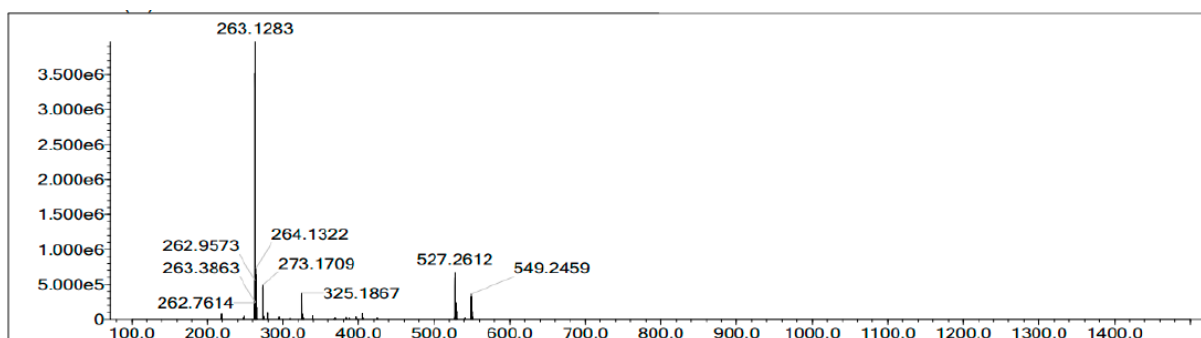

Figure S14. HRESIMS spectrum of **2**

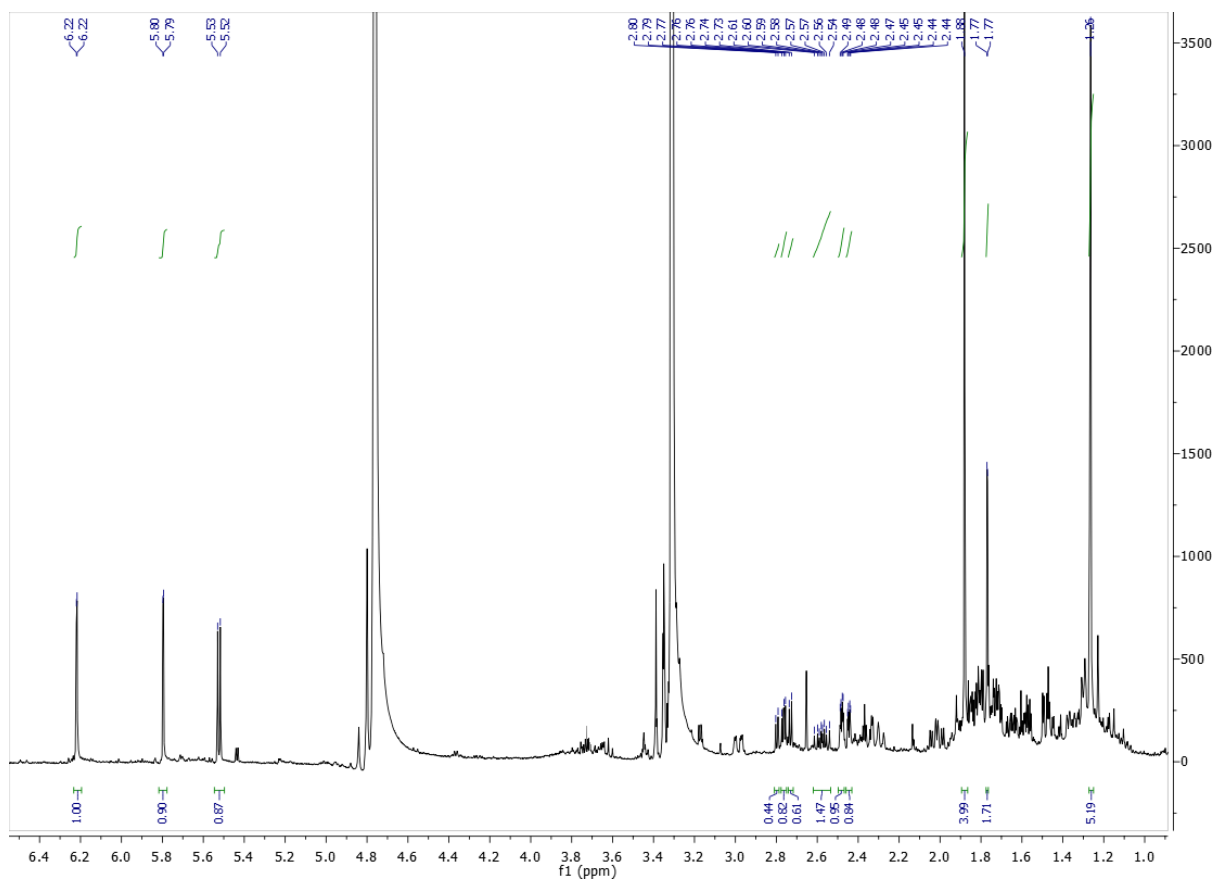

Figure S15.  $^1\text{H}$  NMR spectrum of **2** in methanol- $d_4$  at 600 MHz.

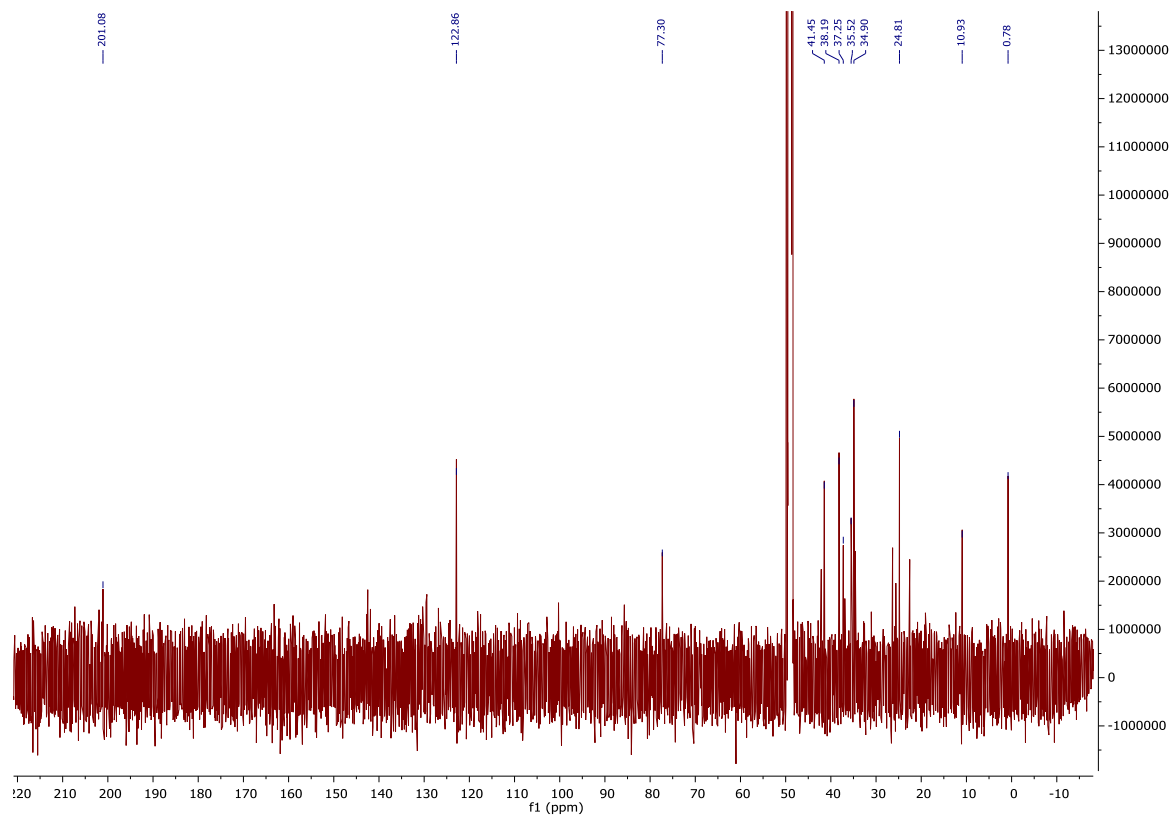

Figure S16.  $^{13}\text{C}$  NMR spectrum of **2** in methanol- $d_4$  at 600 MHz.

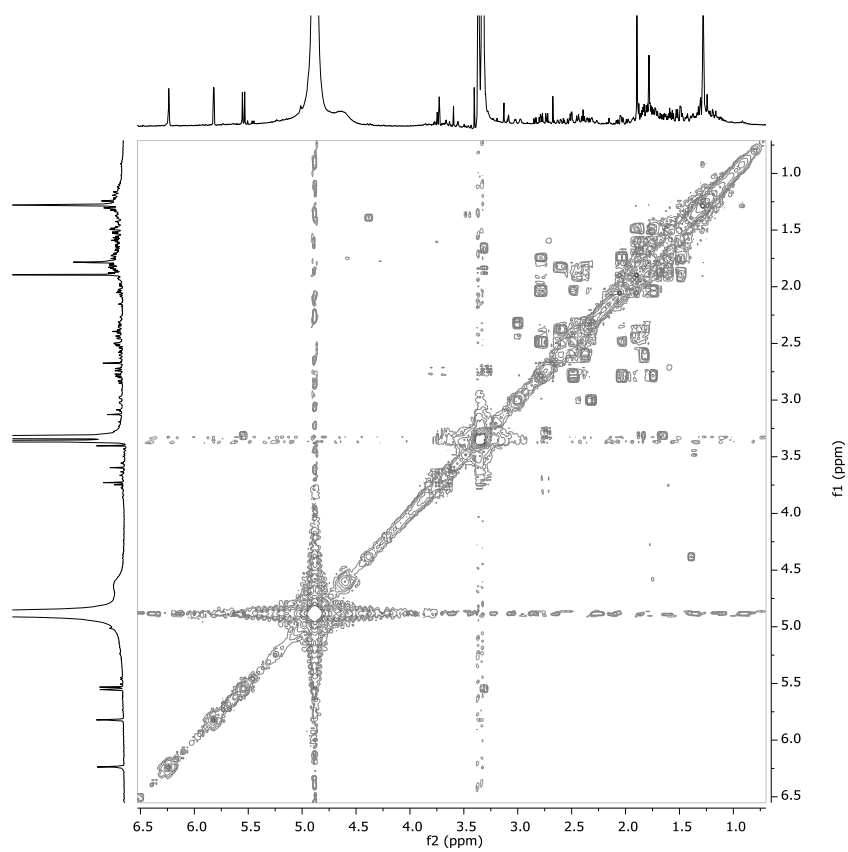

Figure S17.  $^1\text{H}$ - $^1\text{H}$  COSY spectrum of **2** in methanol- $d_4$  at 600 MHz.

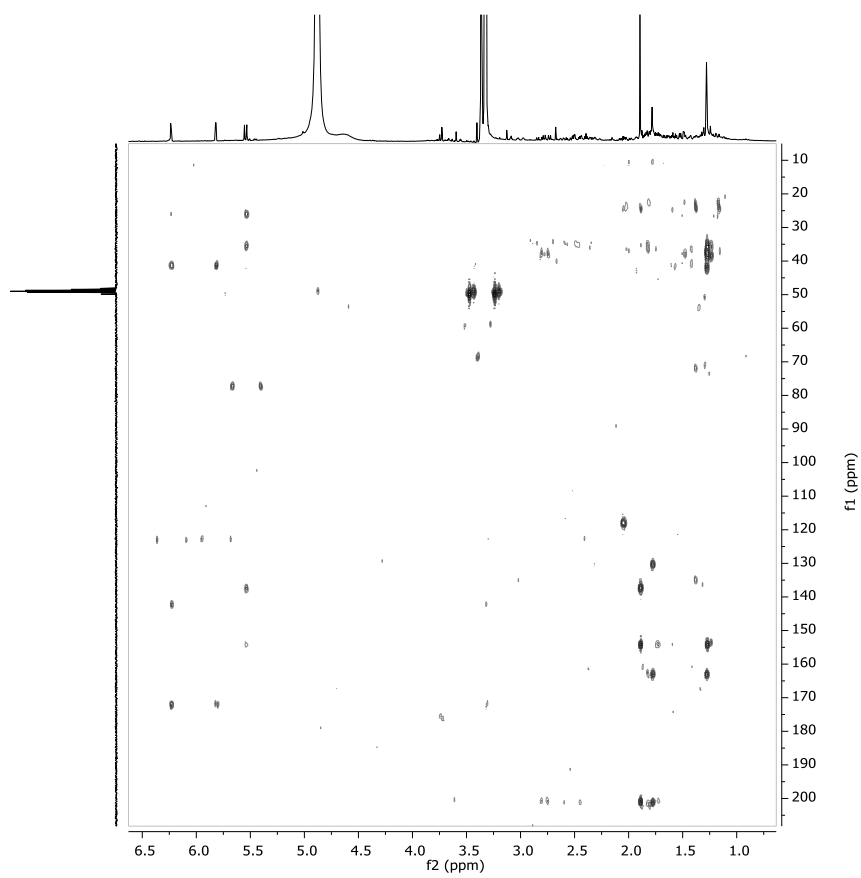

Figure S18.  $g\text{HMBC}$  spectrum of **2** in methanol- $d_4$  at 600 MHz.

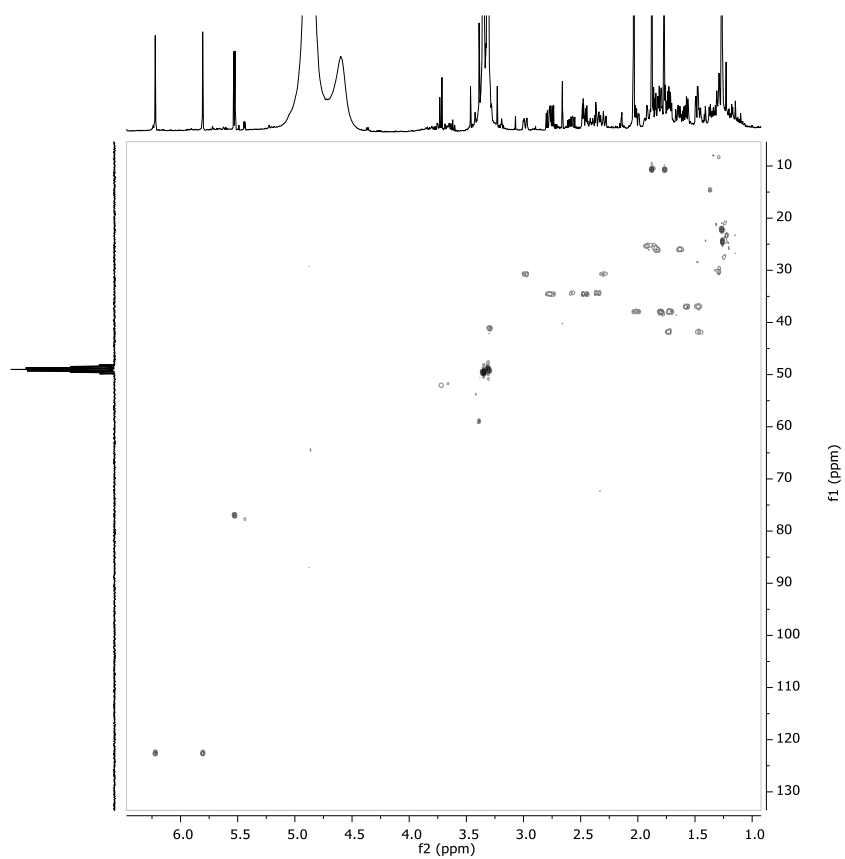

Figure S19. gHMOC spectrum of **2** in methanol-*d*<sub>4</sub> at 600 MHz.

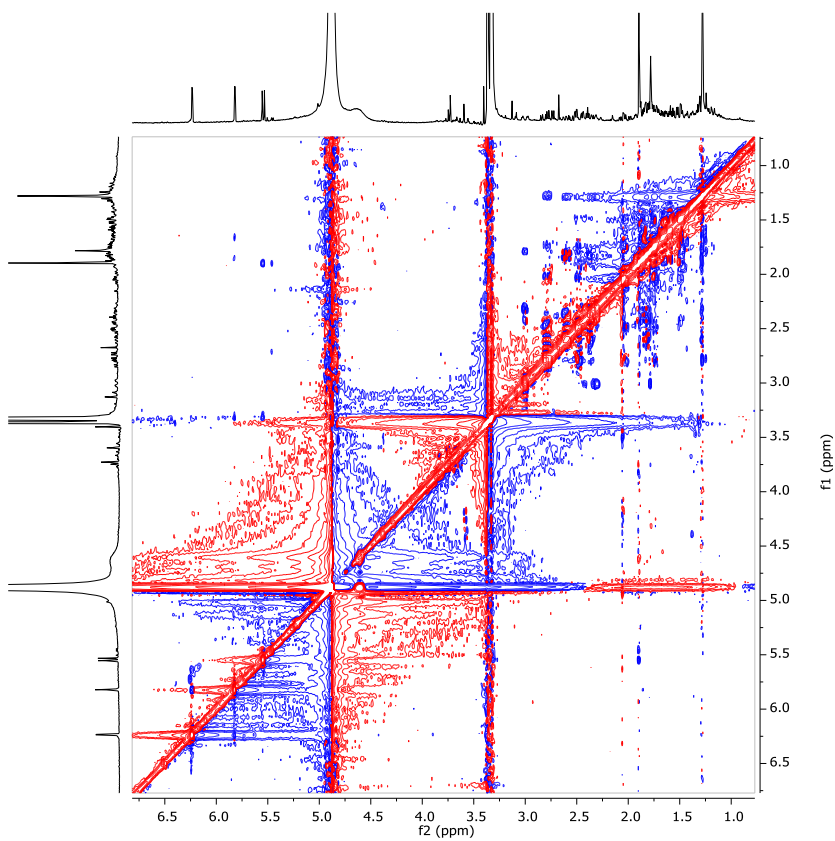

Figure S20. ROESY spectrum of **2** in methanol-*d*<sub>4</sub> at 600 MHz.

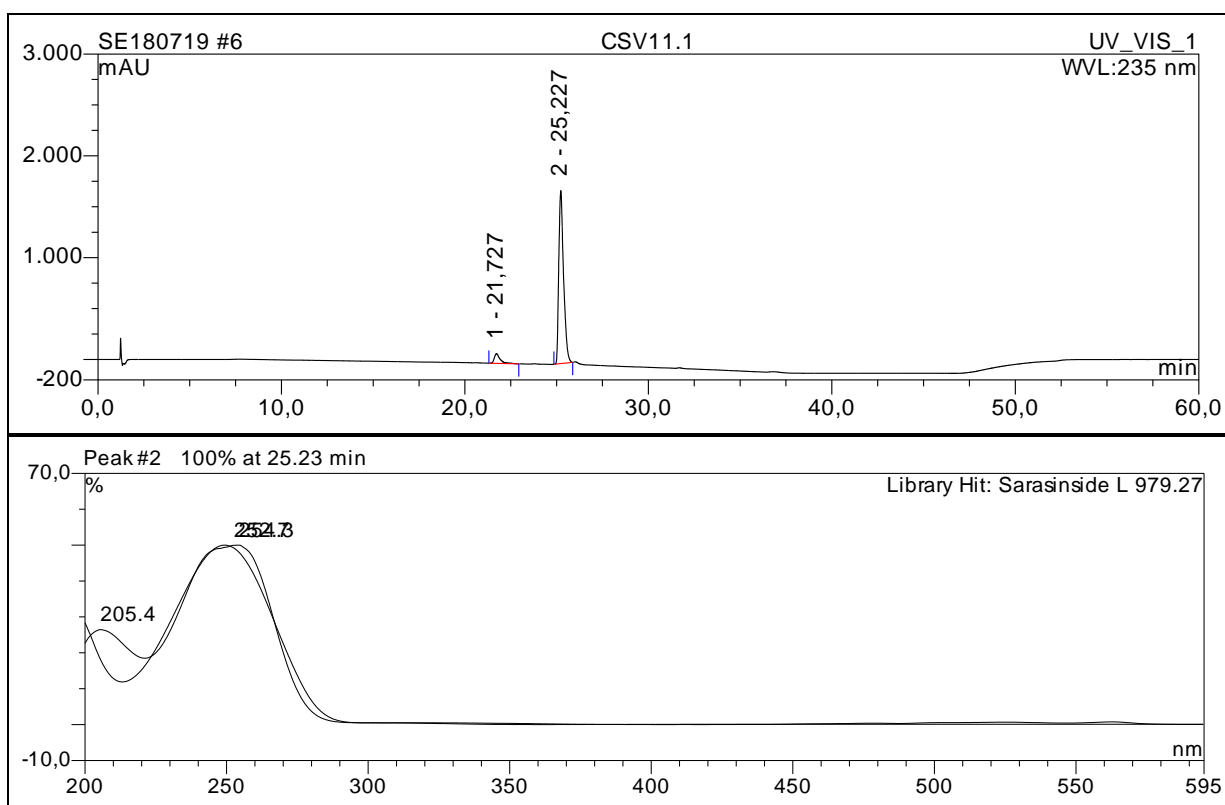

Figure S21. HPLC chromatogram of **3**

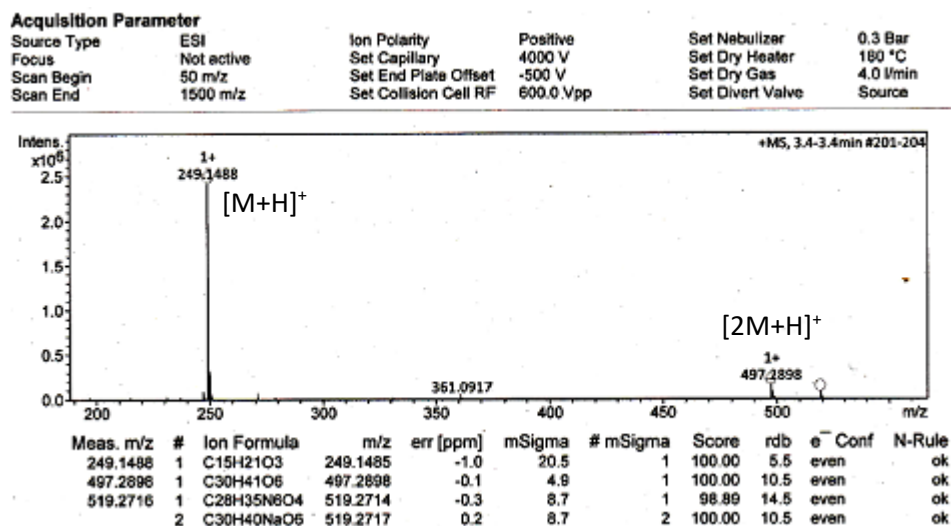

Figure S22. HRESIMS spectrum of **3**

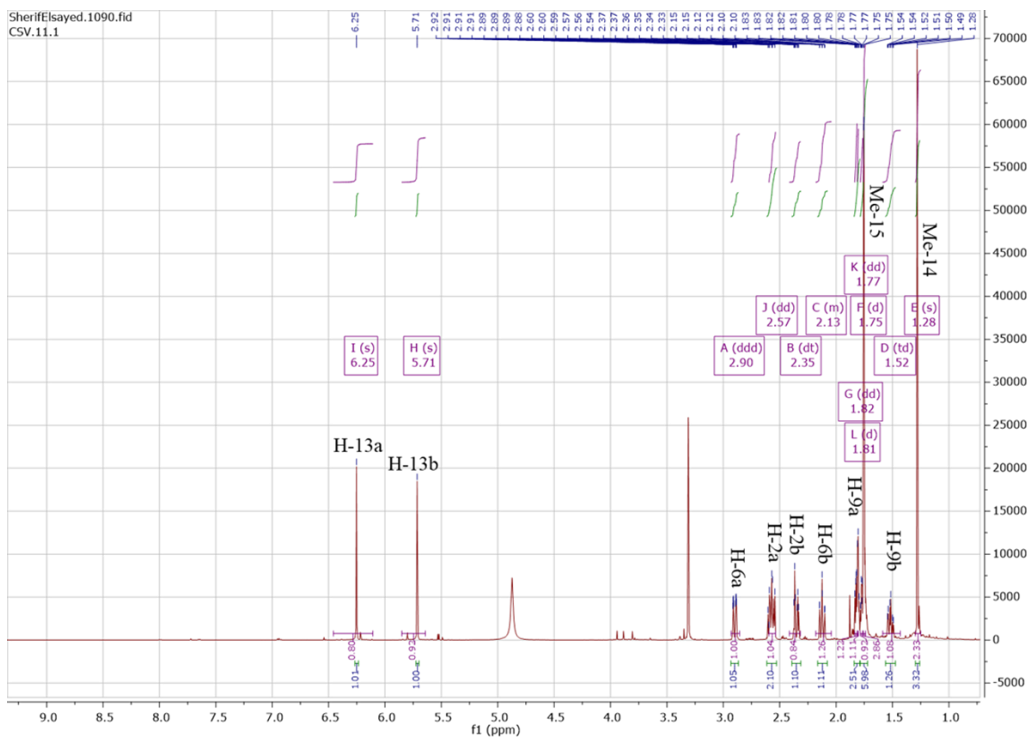

Figure S23.  $^1\text{H}$  NMR spectrum of **3** in methanol- $d_4$  at 600 MHz.

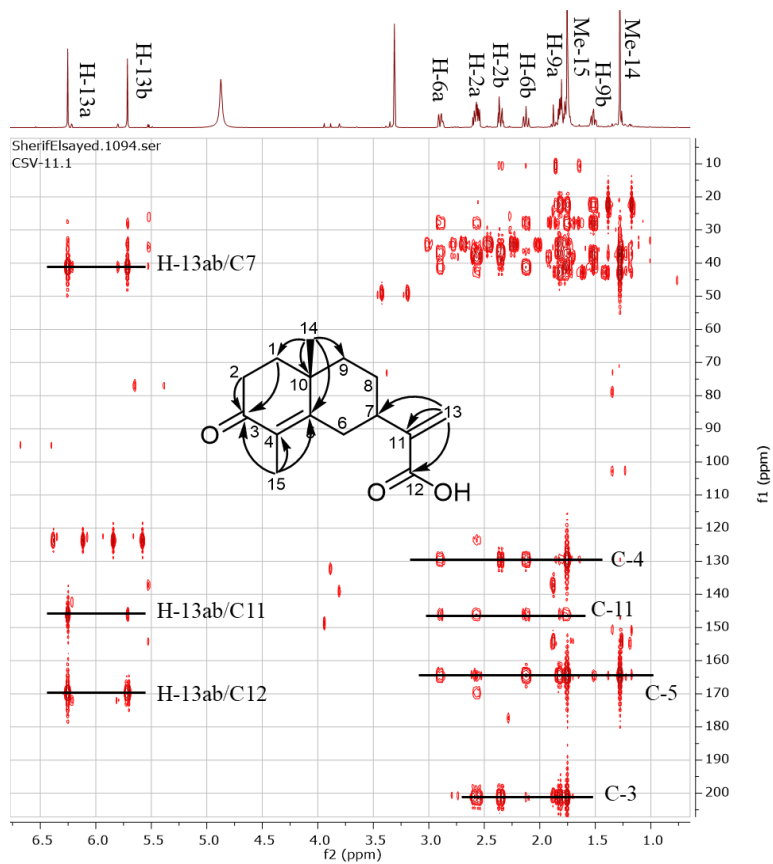

Figure S24. gHMBC spectrum of **3** in methanol- $d_4$  at 600 MHz.

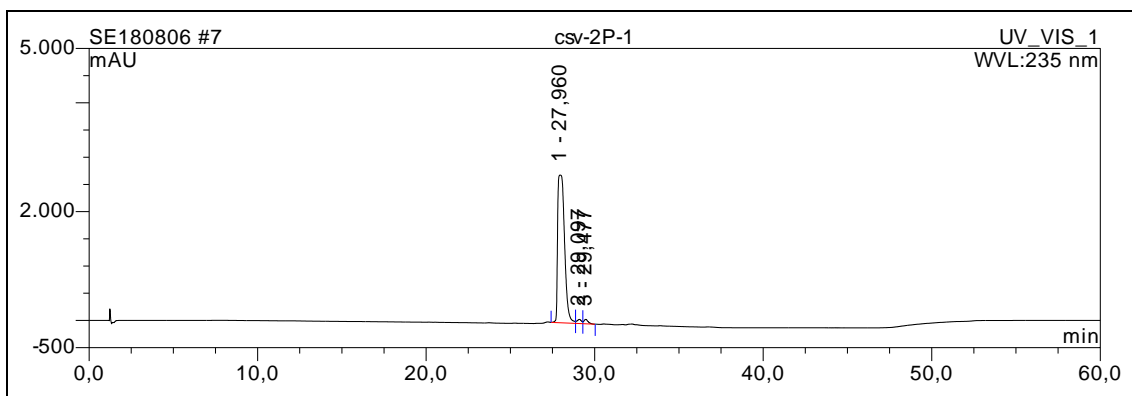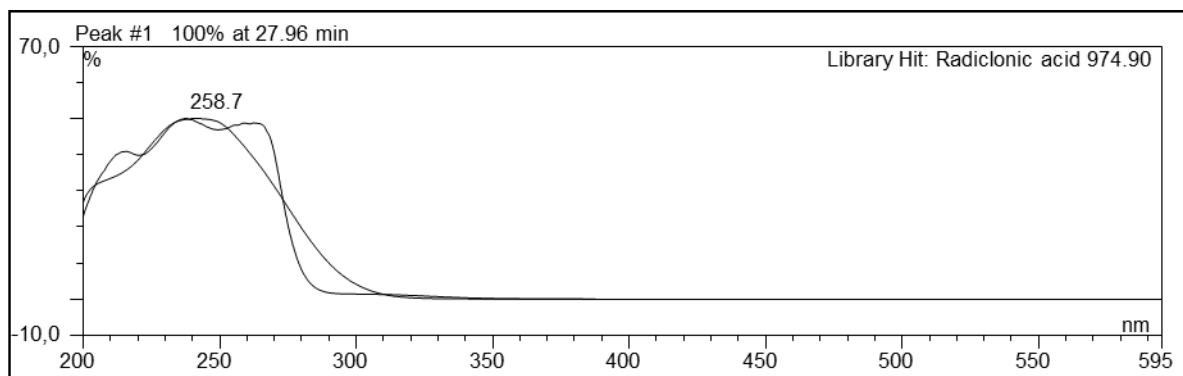

Figure S25. HPLC chromatogram of **4**

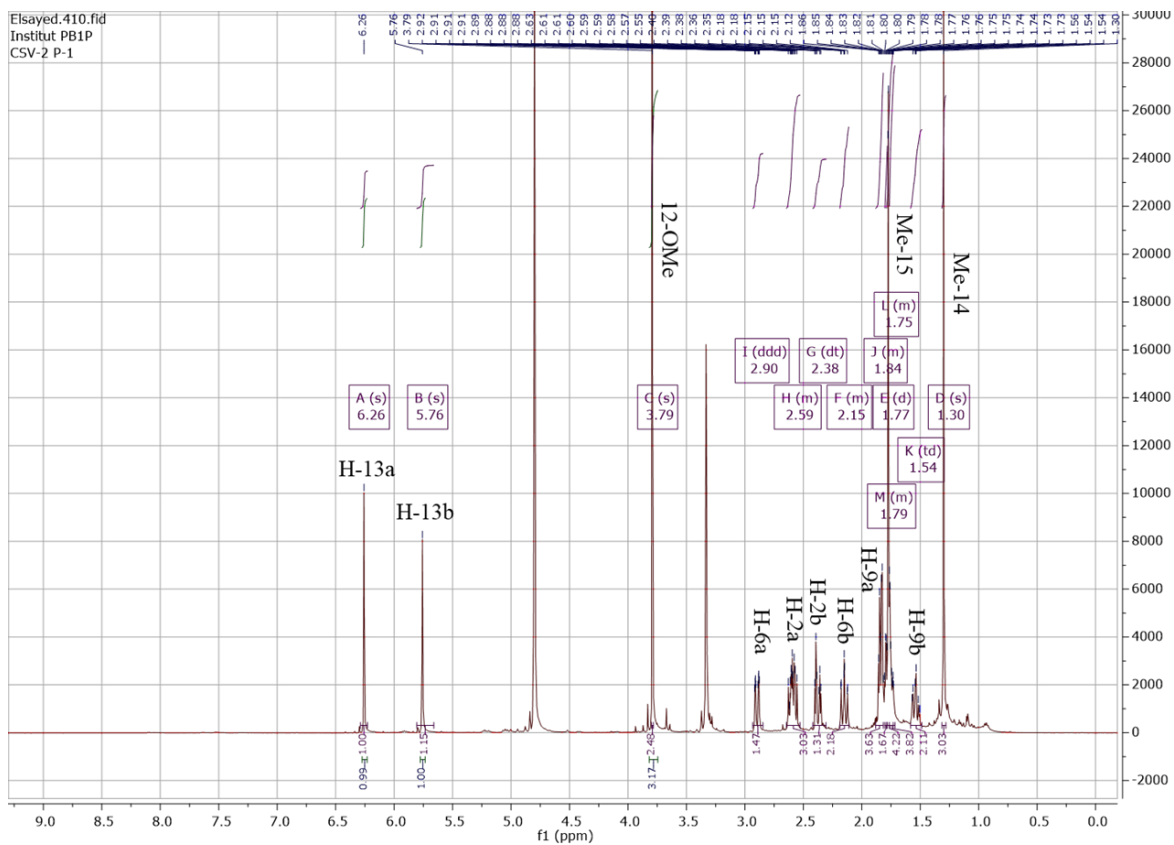

Figure S26.  $^1\text{H}$  NMR spectrum of **4** in methanol- $d_4$  at 600 MHz.



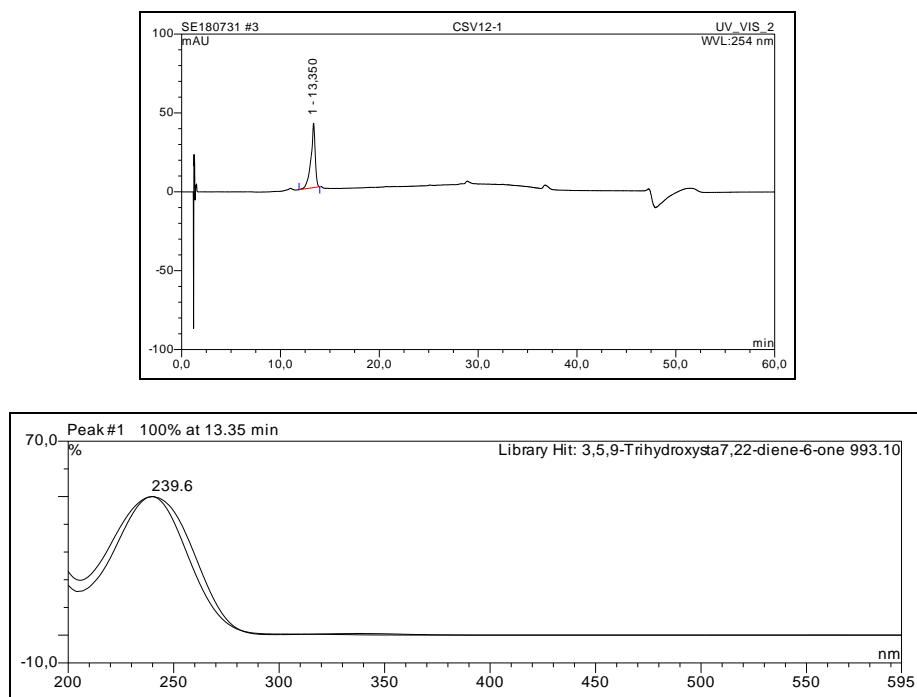

Figure S27. HPLC chromatogram and UV spectrum of **5**

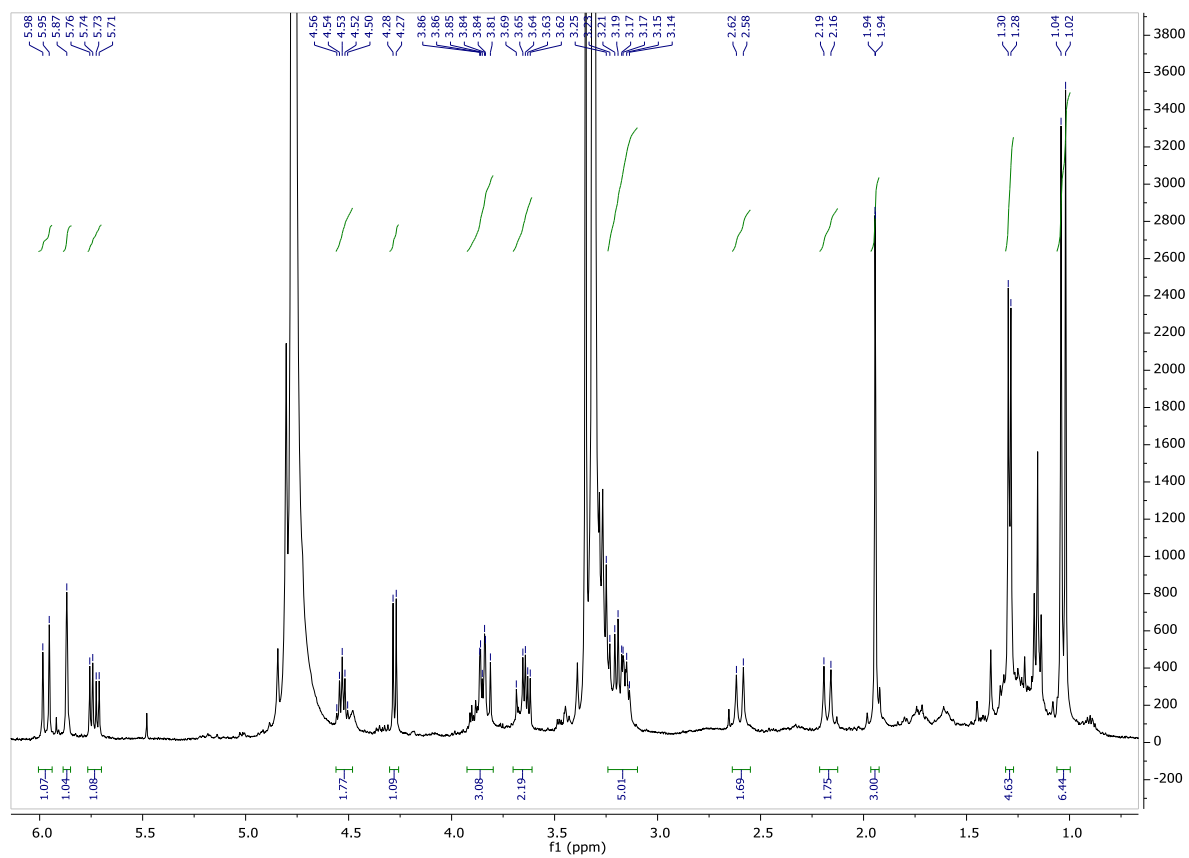

Figure S28.  $^1\text{H}$  NMR spectrum of **5** in methanol- $d_4$  at 600 MHz.

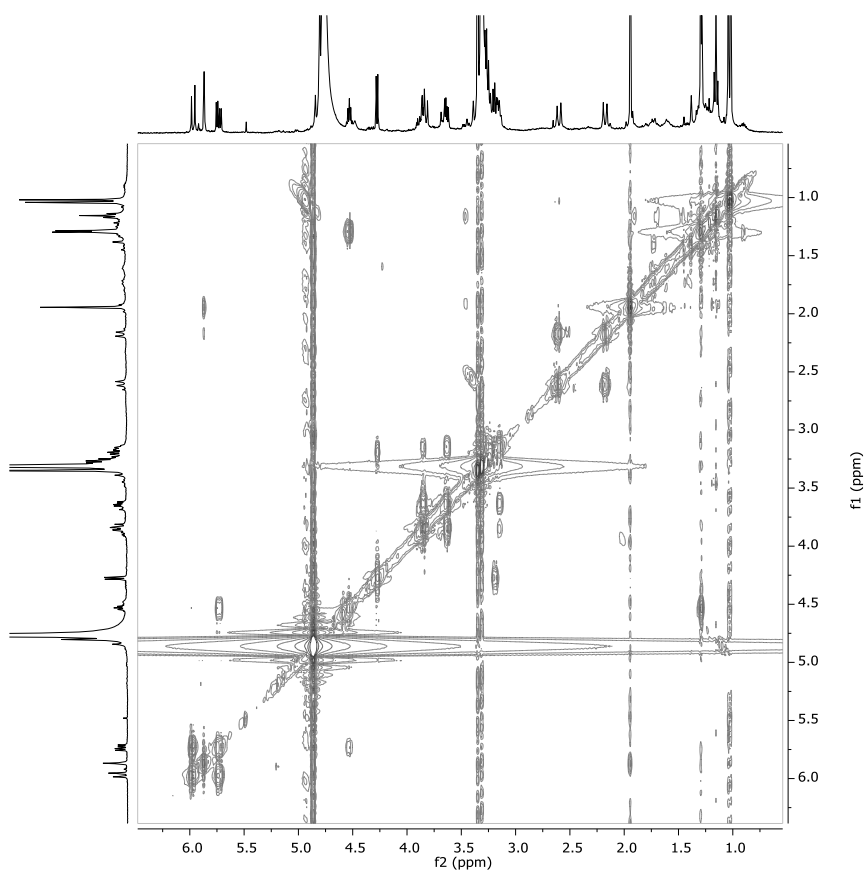

Figure S29.  $^1\text{H}$ - $^1\text{H}$  COSY spectrum of **5** in methanol- $d_4$  at 600 MHz.

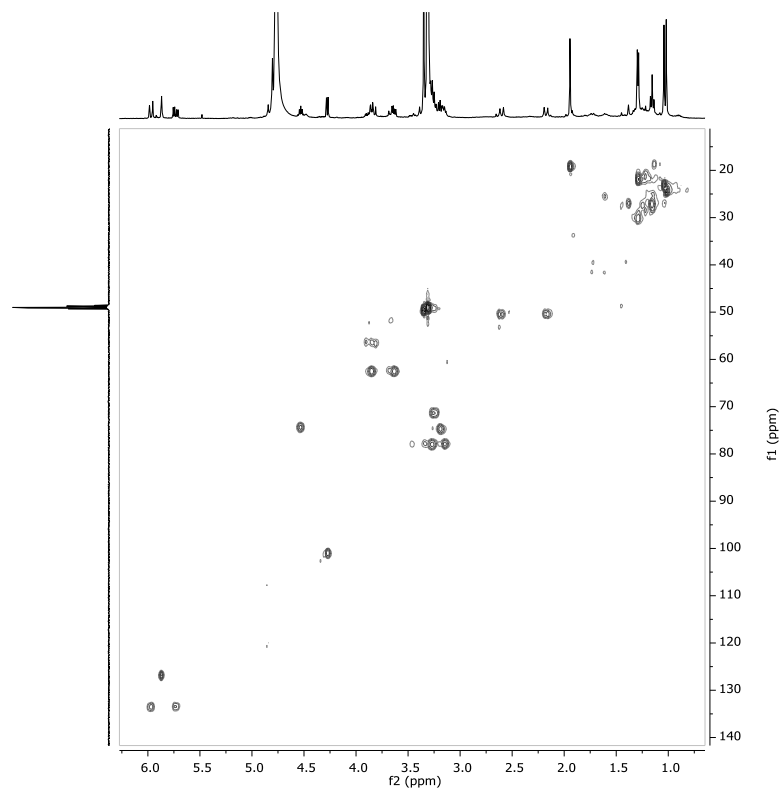

Figure S30. gHMQC spectrum of **5** in methanol- $d_4$  at 600 MHz.

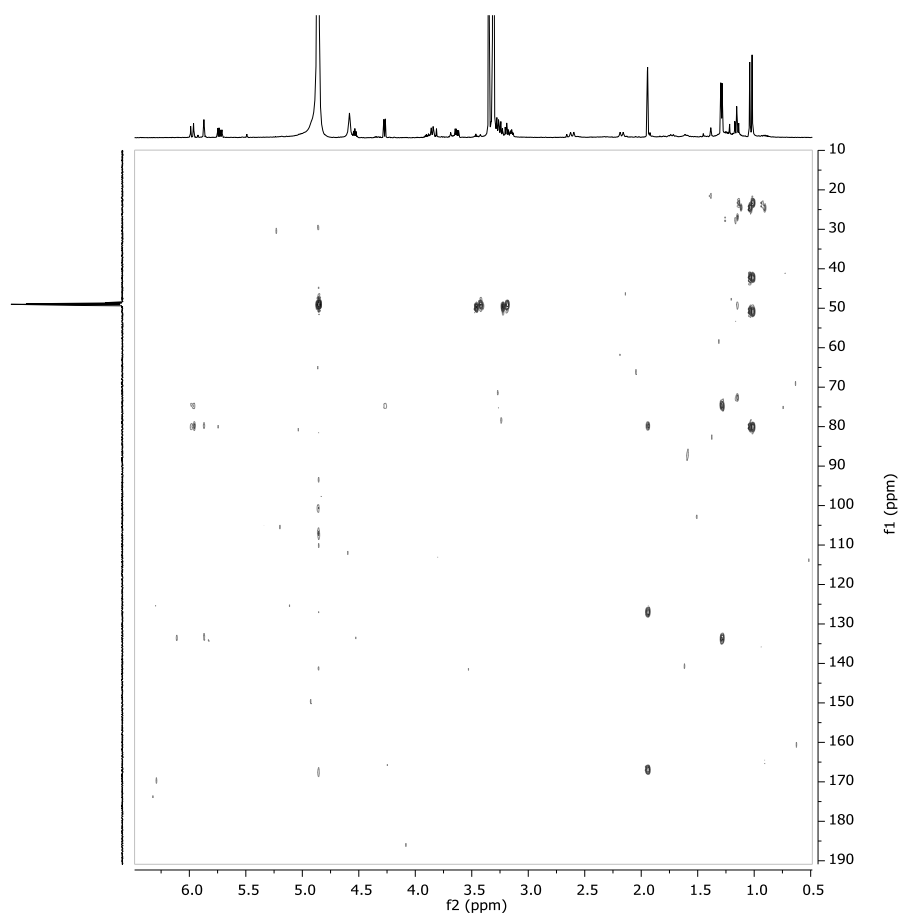

Figure S31. gHMBC spectrum of **5** in methanol-*d*<sub>4</sub> at 600 MHz.

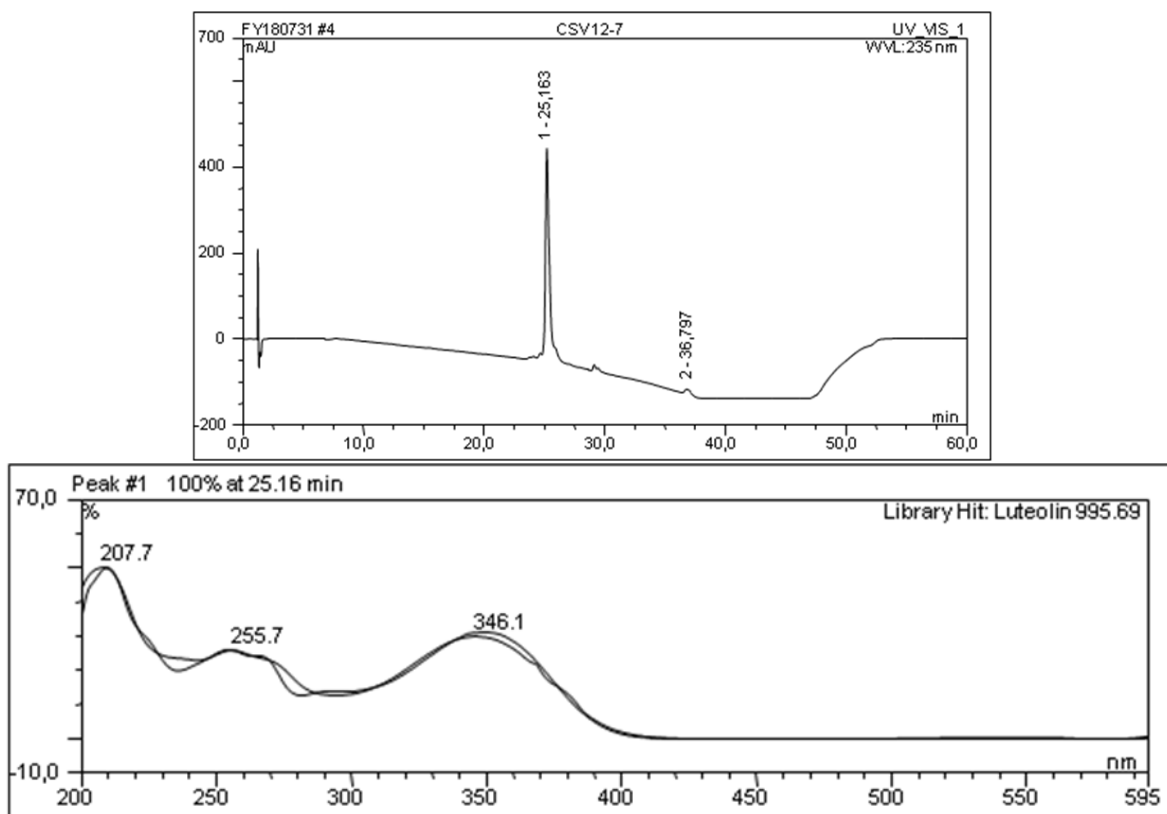

Figure S32. HPLC chromatogram and UV spectrum of **6**

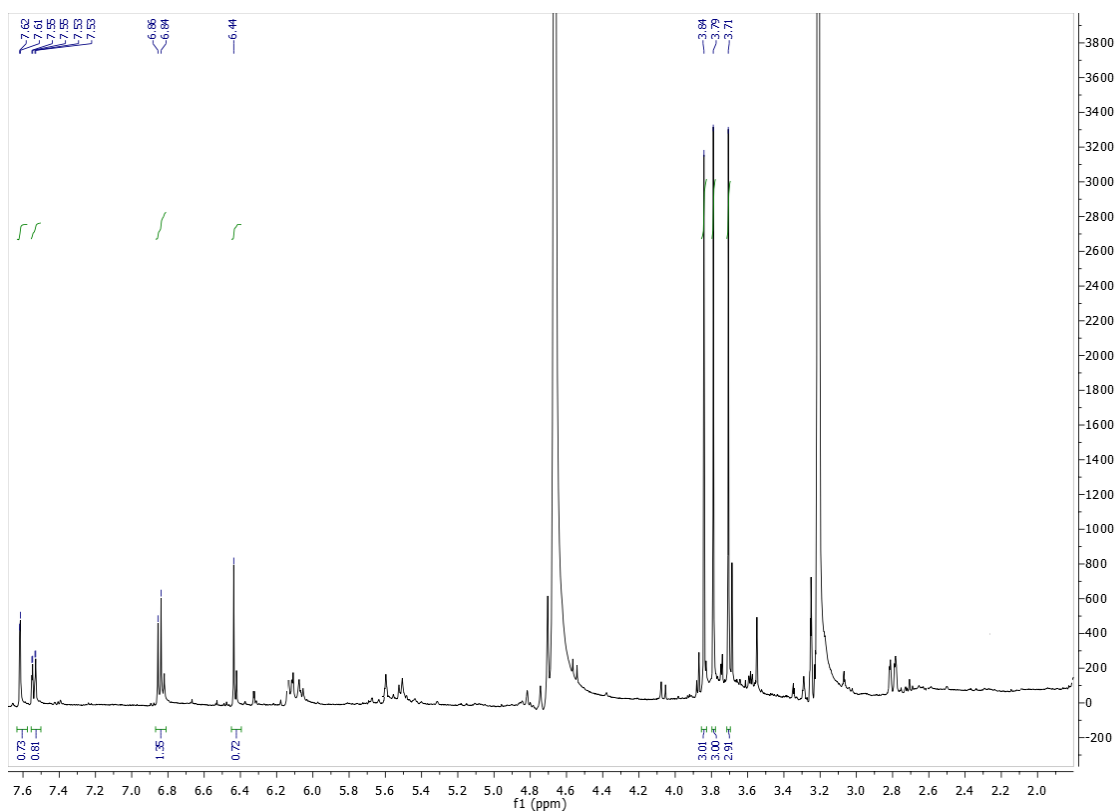

Figure S33. <sup>1</sup>H NMR spectrum of **6** in methanol-*d*<sub>4</sub> at 600 MHz.

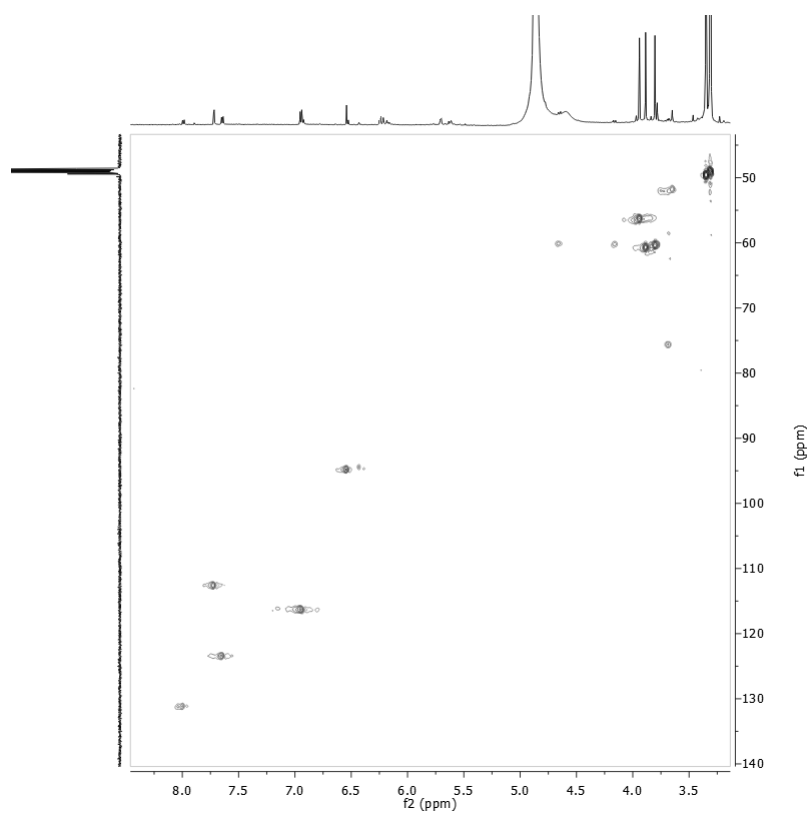

Figure S34. gHMBC spectrum of **6** in methanol- $d_4$  at 600 MHz.

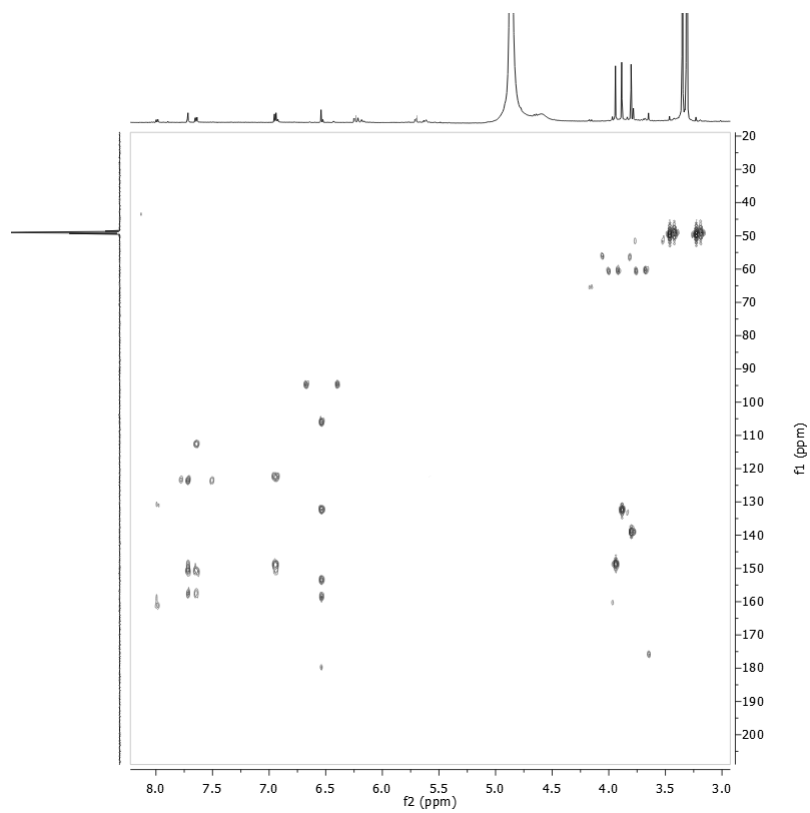

Figure S35. gHMBC spectrum of **6** in methanol- $d_4$  at 600 MHz.

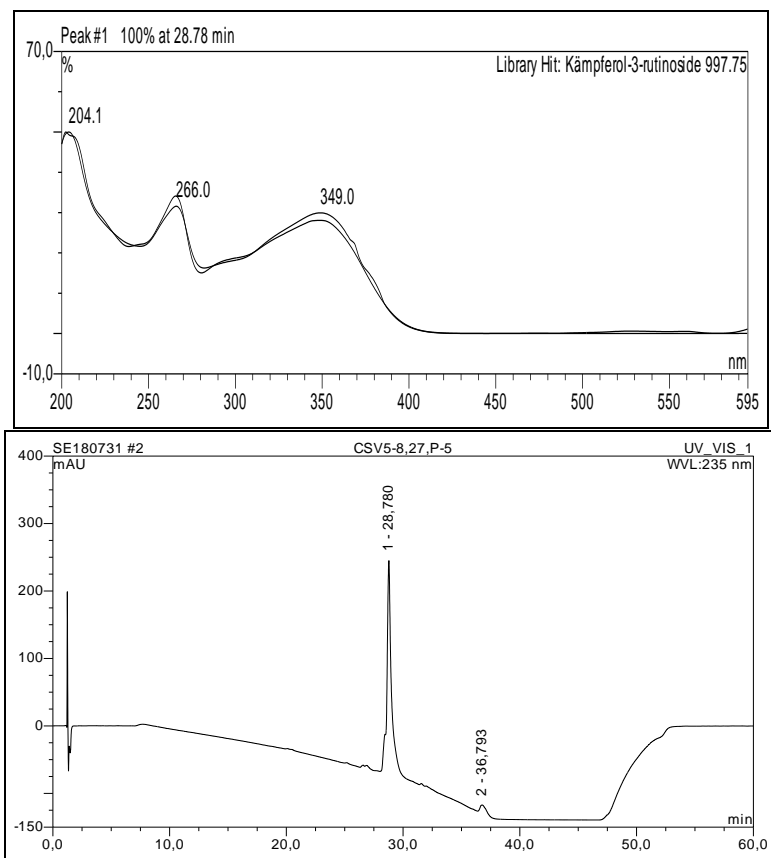

Figure S36. HPLC chromatogram and UV spectrum of **7**

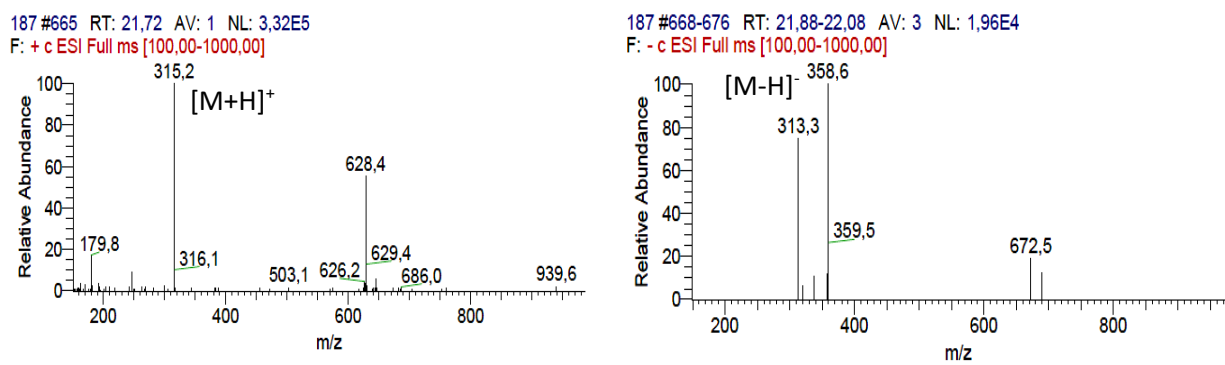

Figure S37. LRESIMS spectrum of **7**

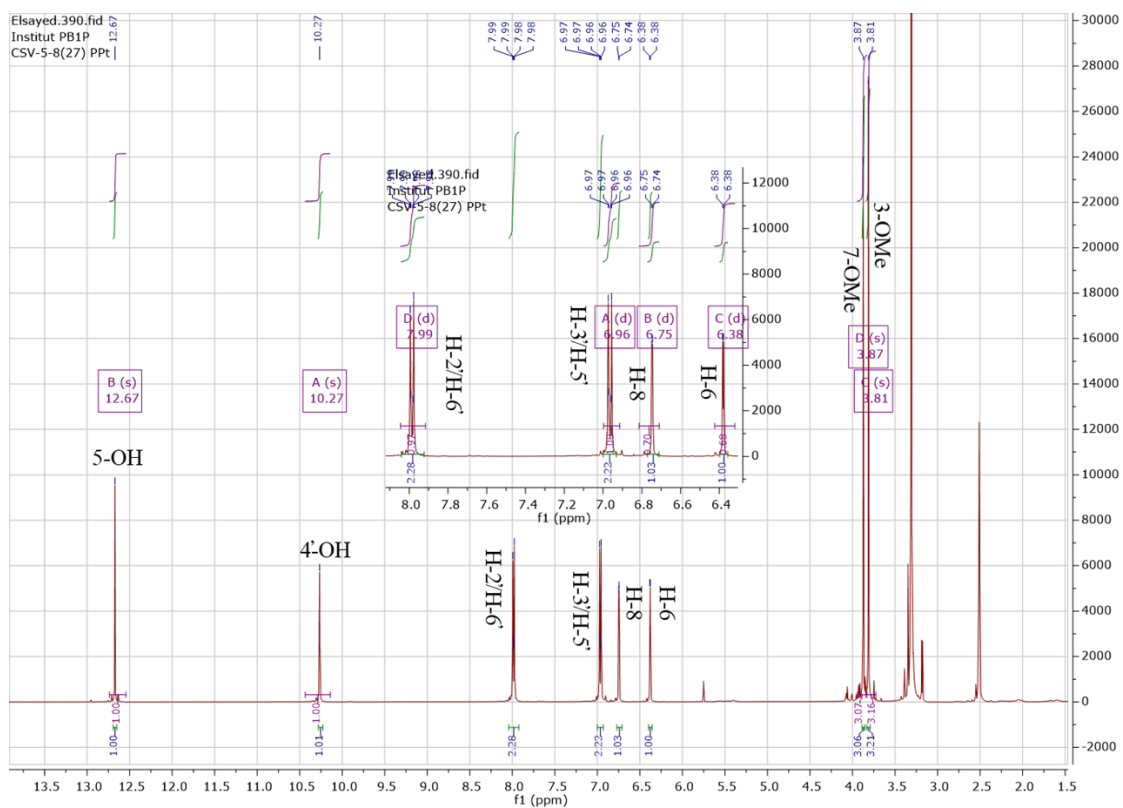

Figure S38.  $^1\text{H}$  NMR spectrum of **7** in  $\text{DMSO-}d_6$  at 600 MHz.

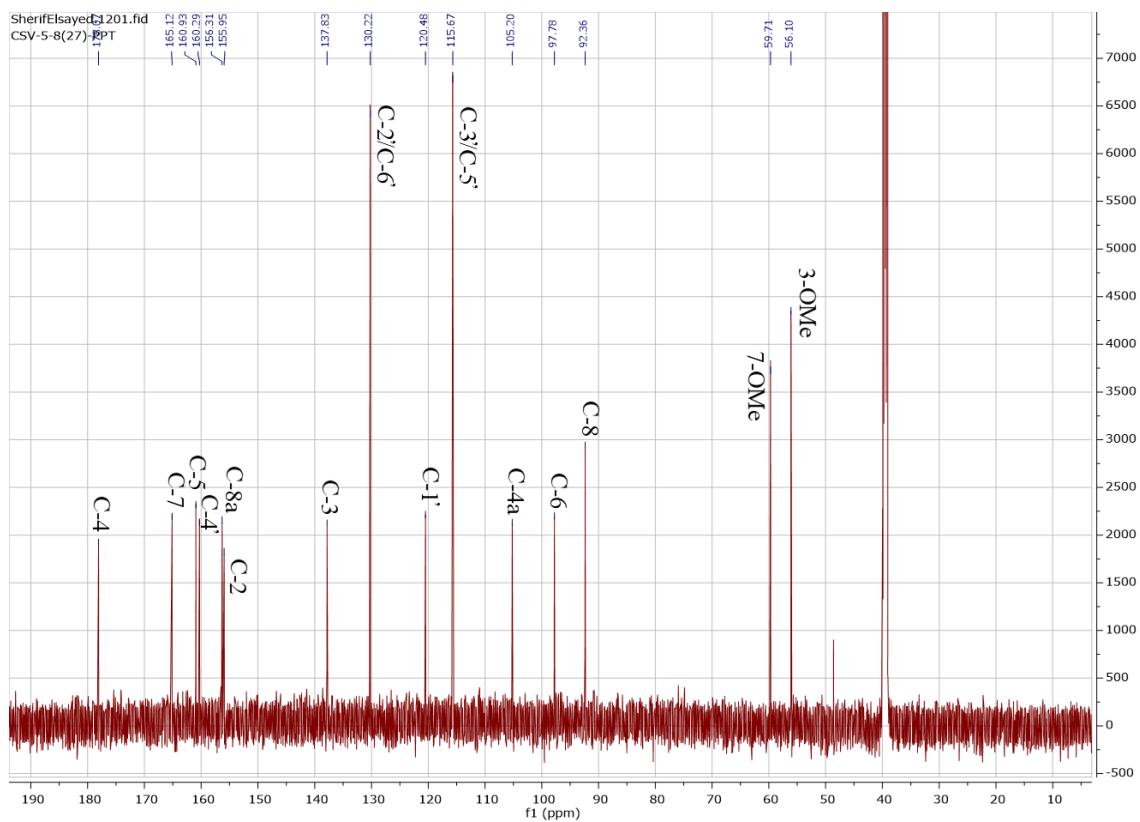

Figure S39.  $^{13}\text{C}$  NMR spectrum of **7** in  $\text{DMSO-}d_6$  at 150 MHz.

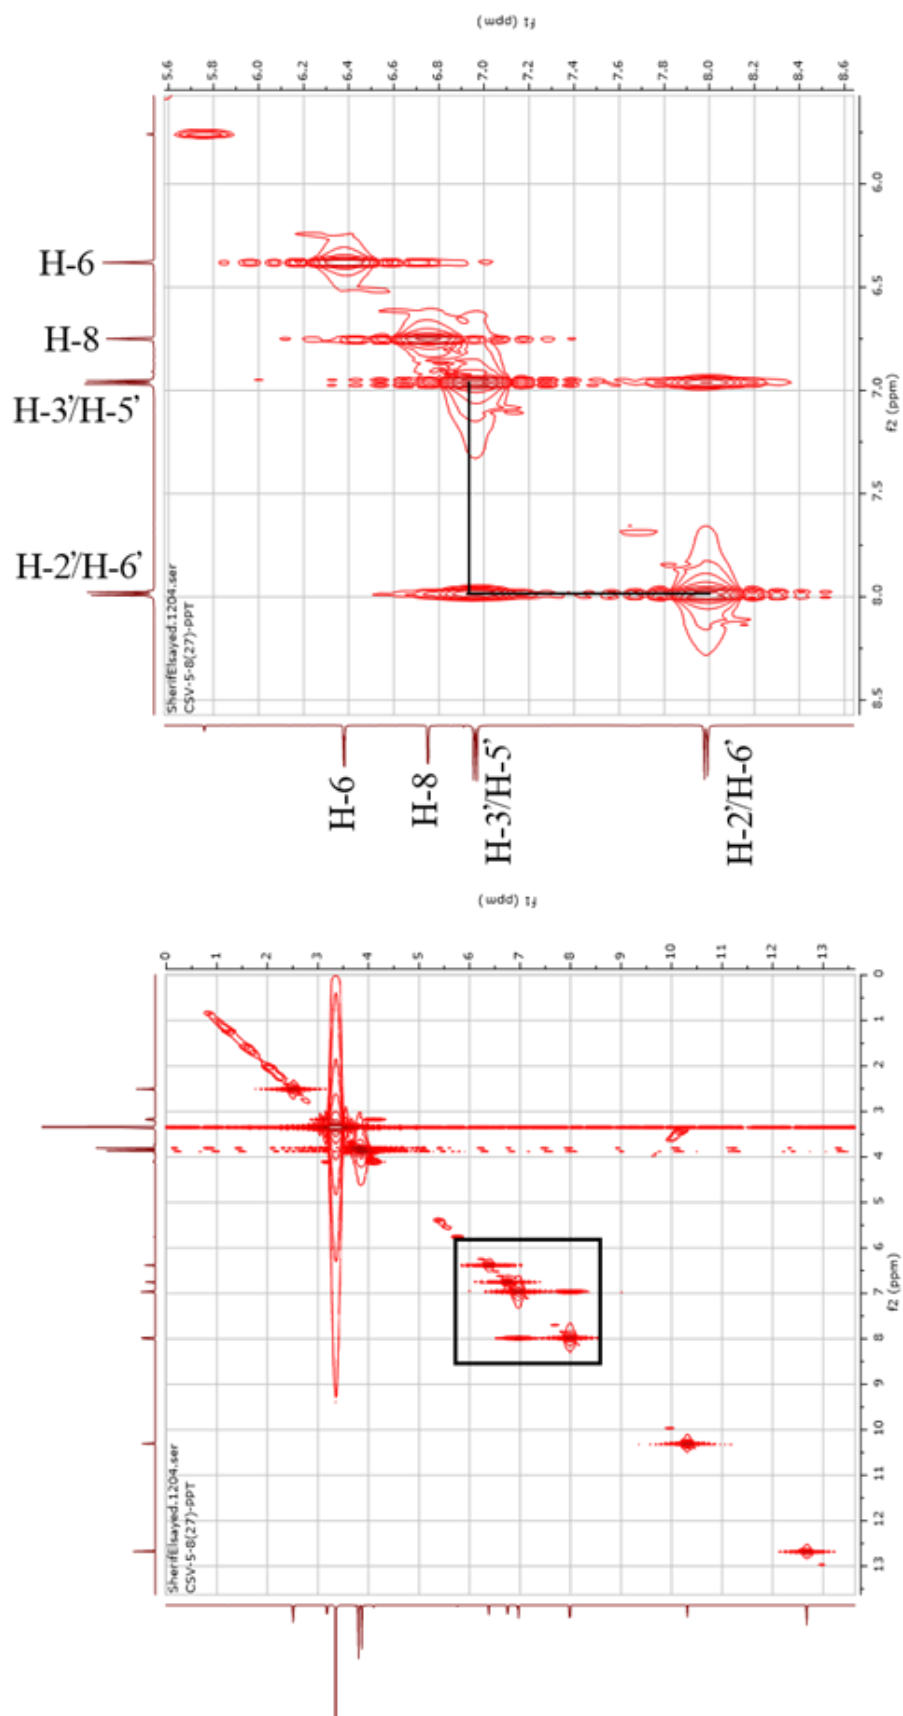

Figure S40.  $^1\text{H}$ - $^1\text{H}$  COSY spectrum of **7** in  $\text{DMSO-}d_6$  at 600 MHz.



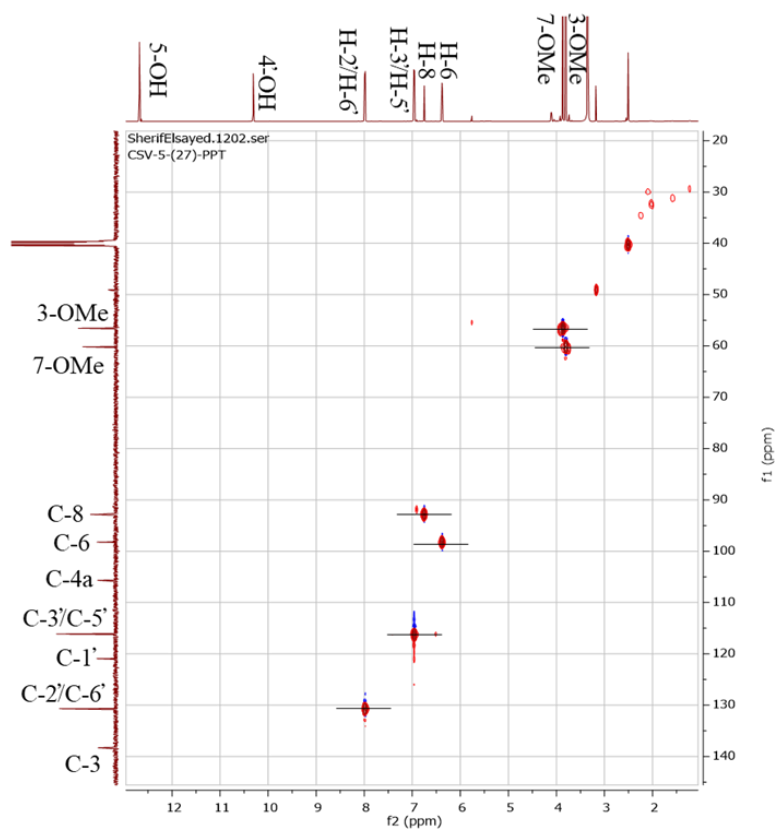

Figure S41. gHMBC spectrum of **7** in DMSO-*d*<sub>6</sub> at 600 MHz.

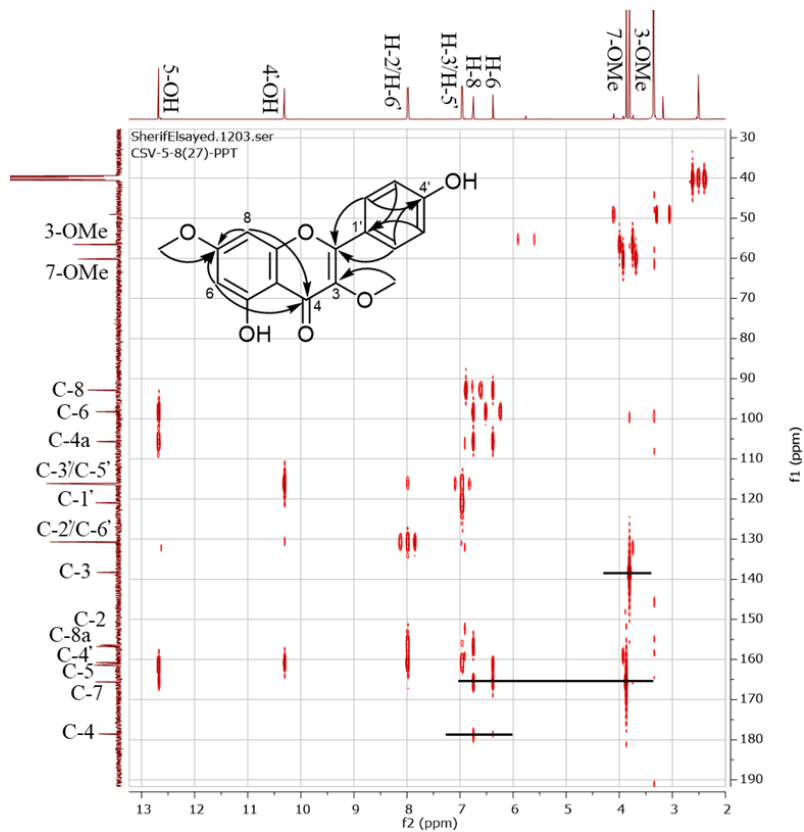

Figure S42. gHMBC spectrum of **7** in DMSO-*d*<sub>6</sub> at 600 MHz.

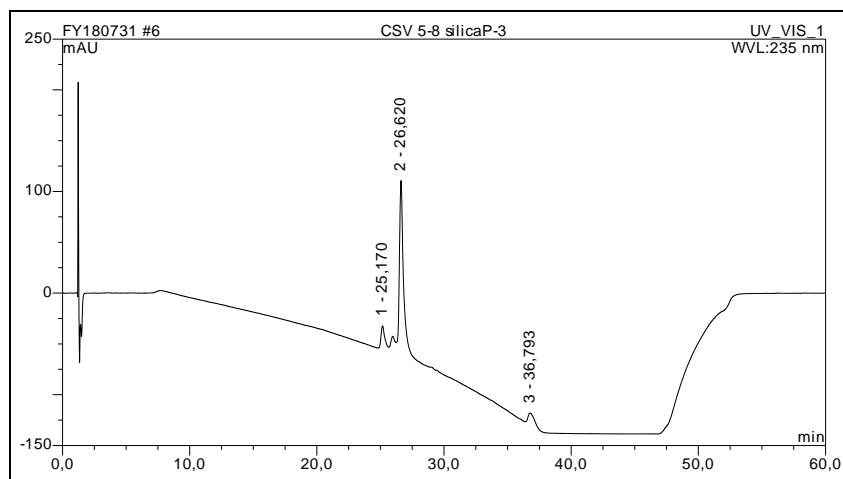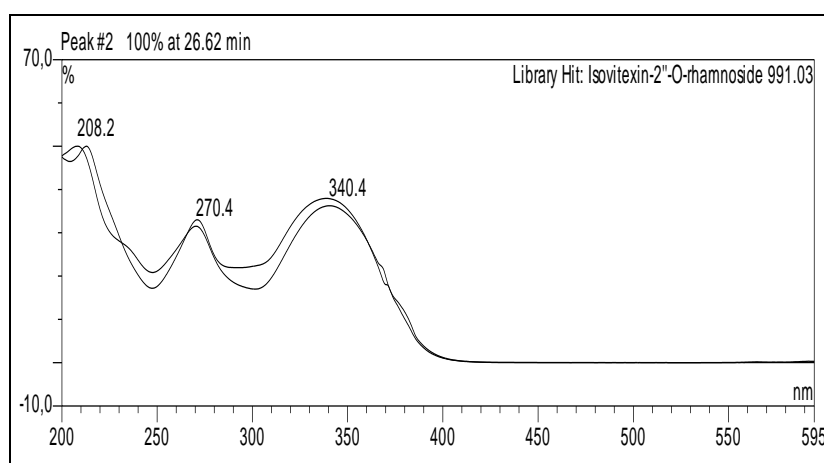

Figure S43. HPLC chromatogram and UV spectrum of **8**

185 #588-606 RT: 18,27-18,78 AV: 6 NL: 4,49E5  
F: + c ESI Full ms [100,00-1000,00]

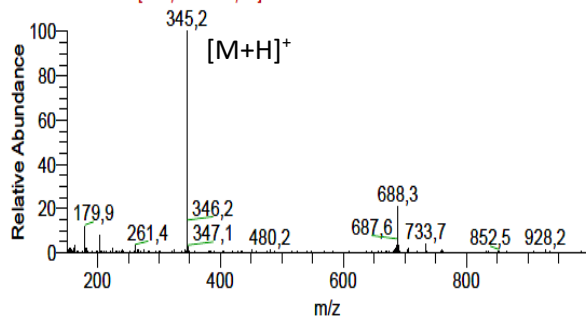

185 #588-603 RT: 18,34-18,75 AV: 5 NL: 2,84E4  
F: - c ESI Full ms [100,00-1000,00]

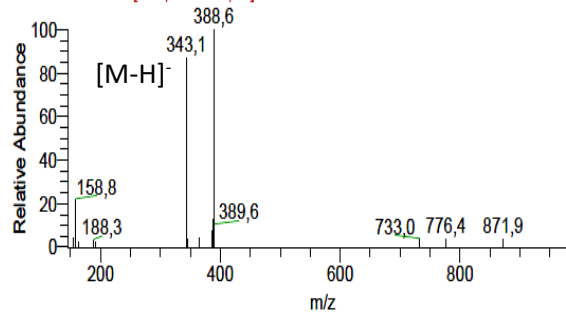

Figure S44. LRESIMS spectrum of **8**

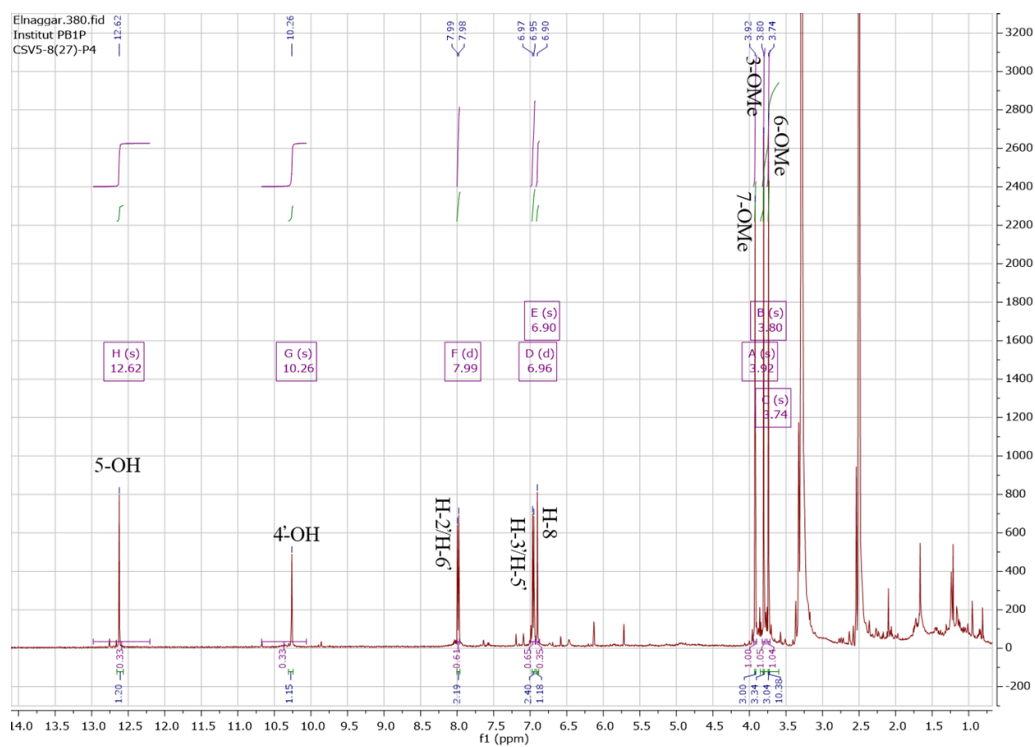

Figure S45.  $^1\text{H}$  NMR spectrum of **8** in  $\text{DMSO-}d_6$  at 600 MHz.

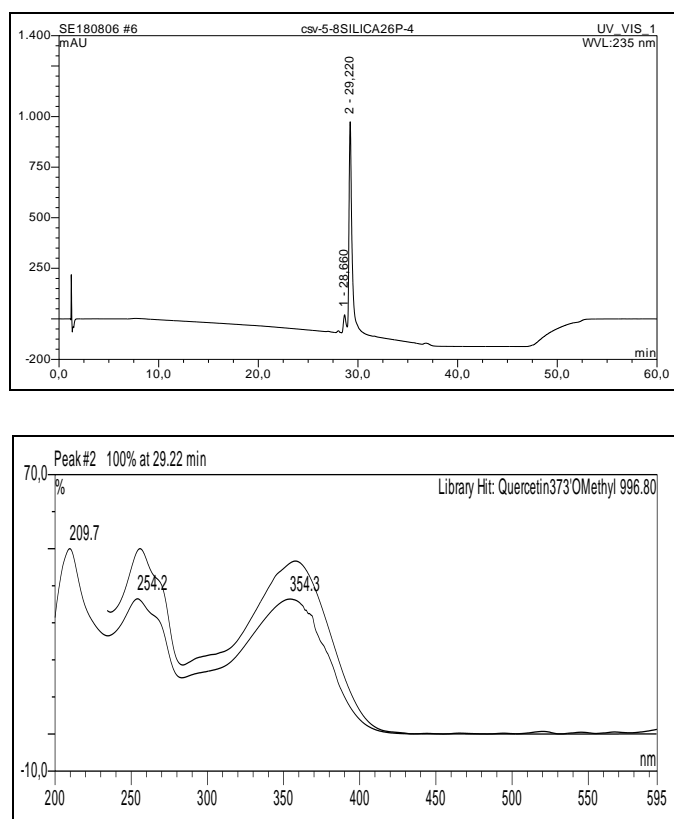

Figure S46. HPLC chromatogram and UV spectrum of **9**

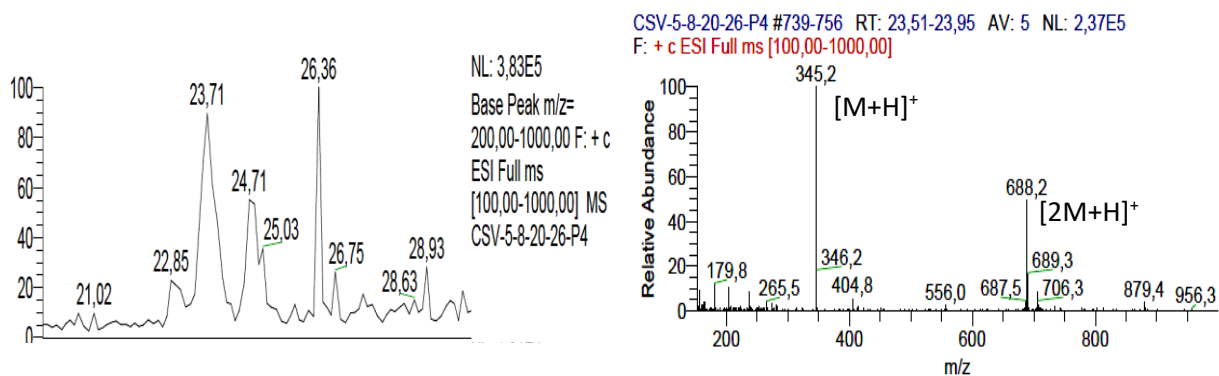

Figure S47. LRESIMS spectrum of **9**

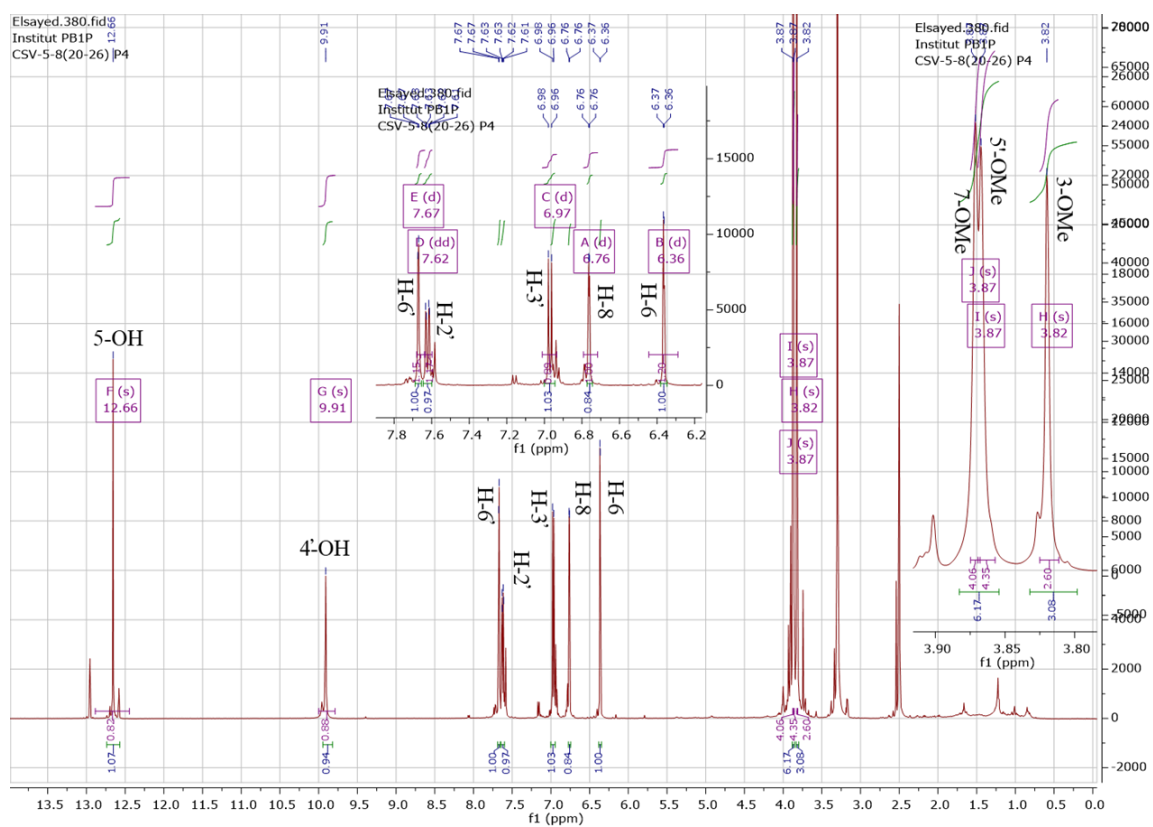

Figure S48.  $^1\text{H}$  NMR spectrum of **9** in  $\text{DMSO-}d_6$  at 600 MHz.

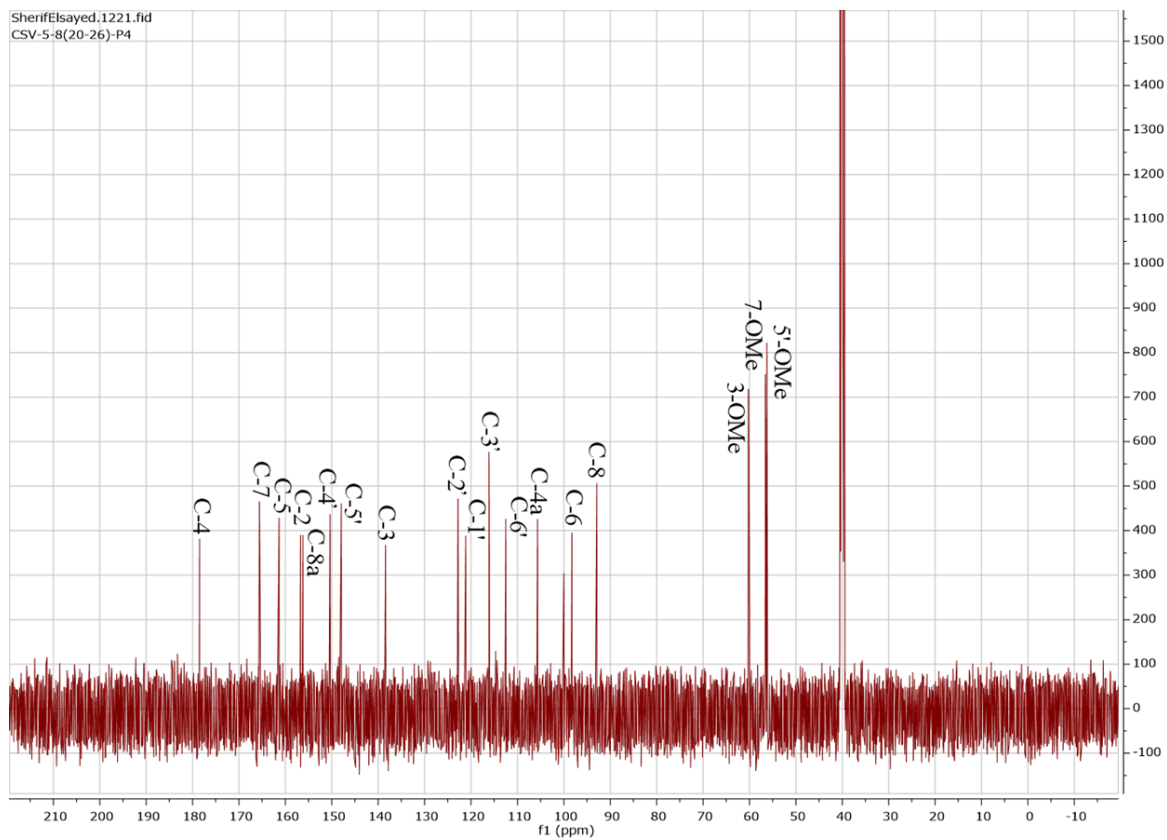

Figure S49.  $^{13}\text{C}$  NMR spectrum of **9** in  $\text{DMSO-}d_6$  at 150 MHz.

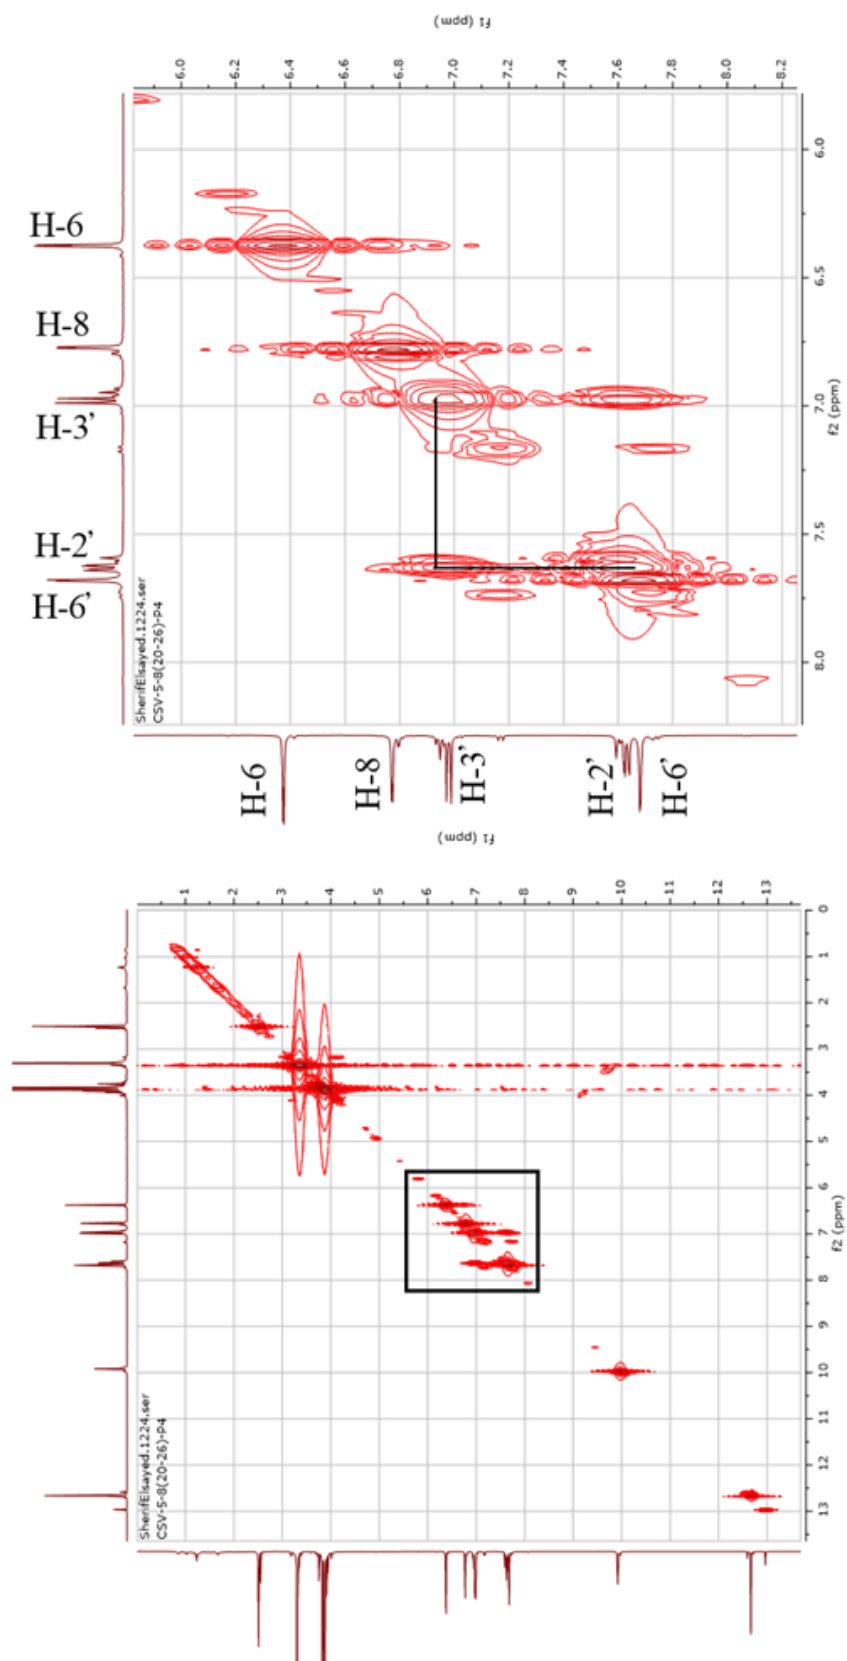

Figure S50.  $^1\text{H}$ - $^1\text{H}$  COSY spectrum of **9** in  $\text{DMSO-}d_6$  at 600 MHz.

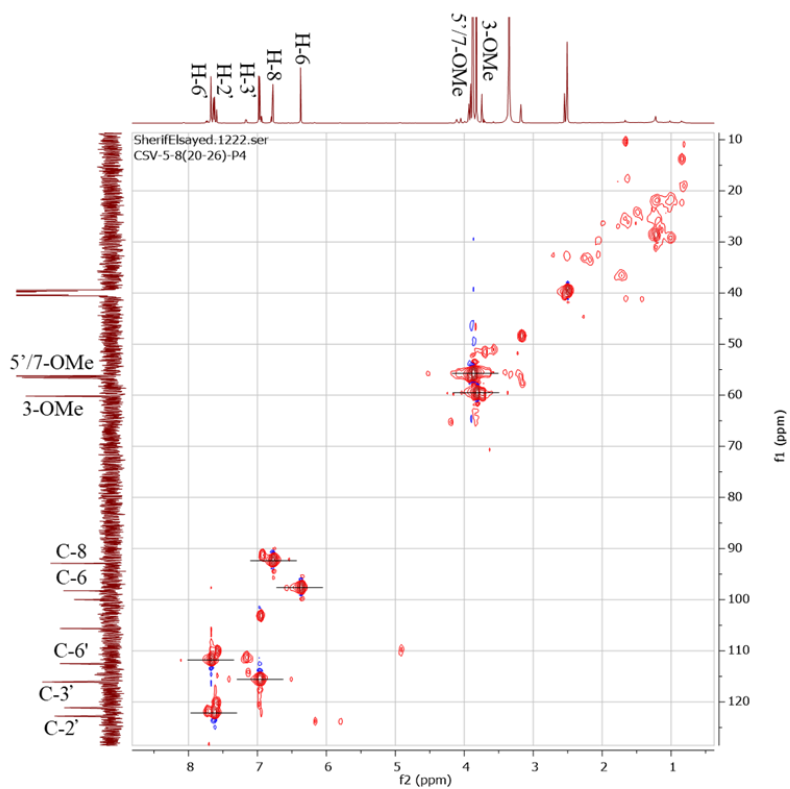

Figure S51. gHMBC spectrum of **9** in DMSO-*d*<sub>6</sub> at 600 MHz.

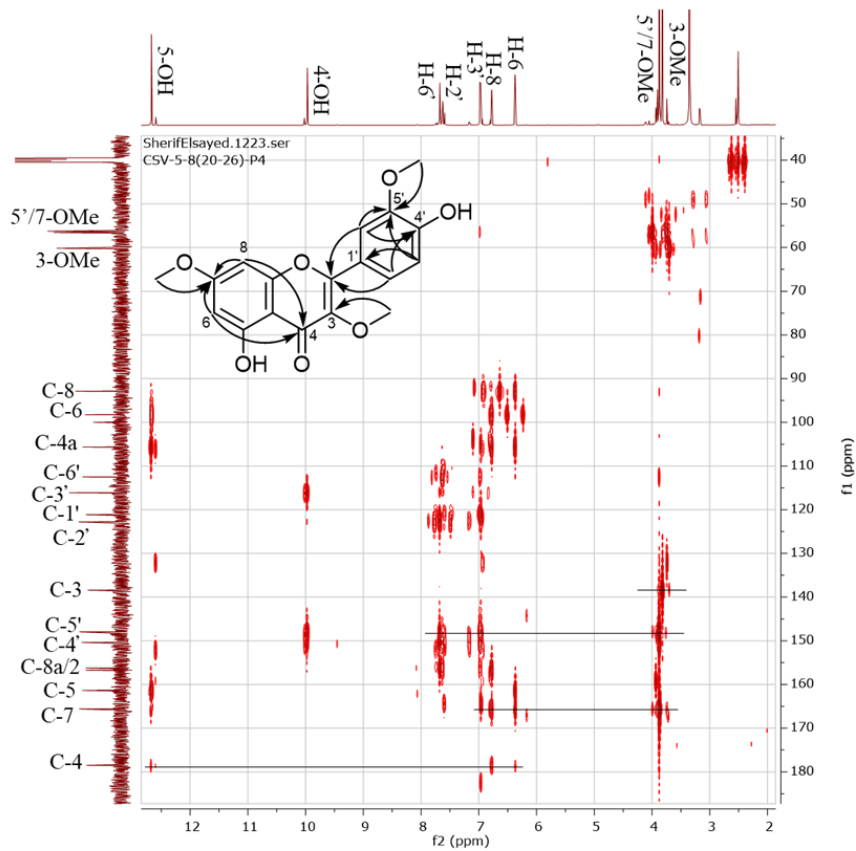

Figure S52. gHMBC spectrum of **9** in DMSO-*d*<sub>6</sub> at 600 MHz.

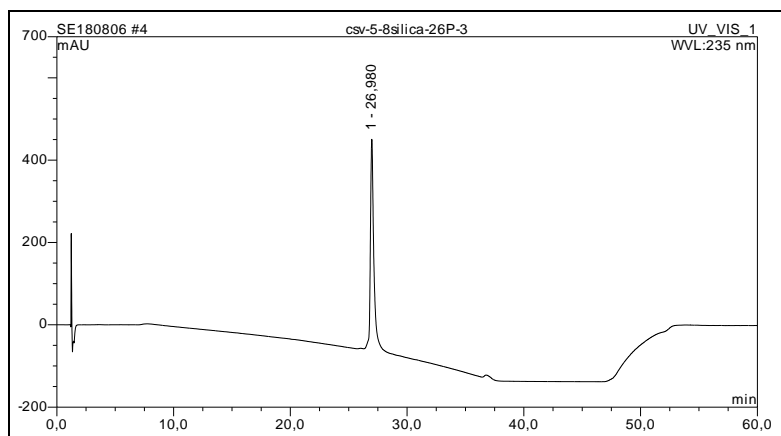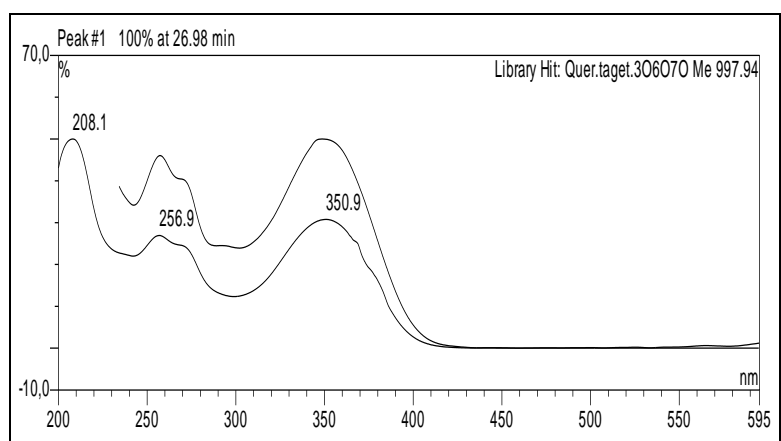

Figure S53. HPLC chromatogram and UV spectrum of **10**

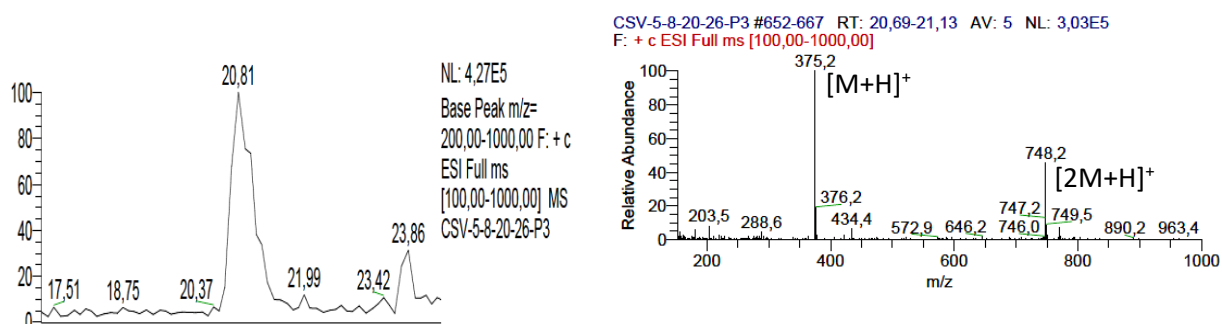

Figure S54. LRESIMS spectrum of **10**



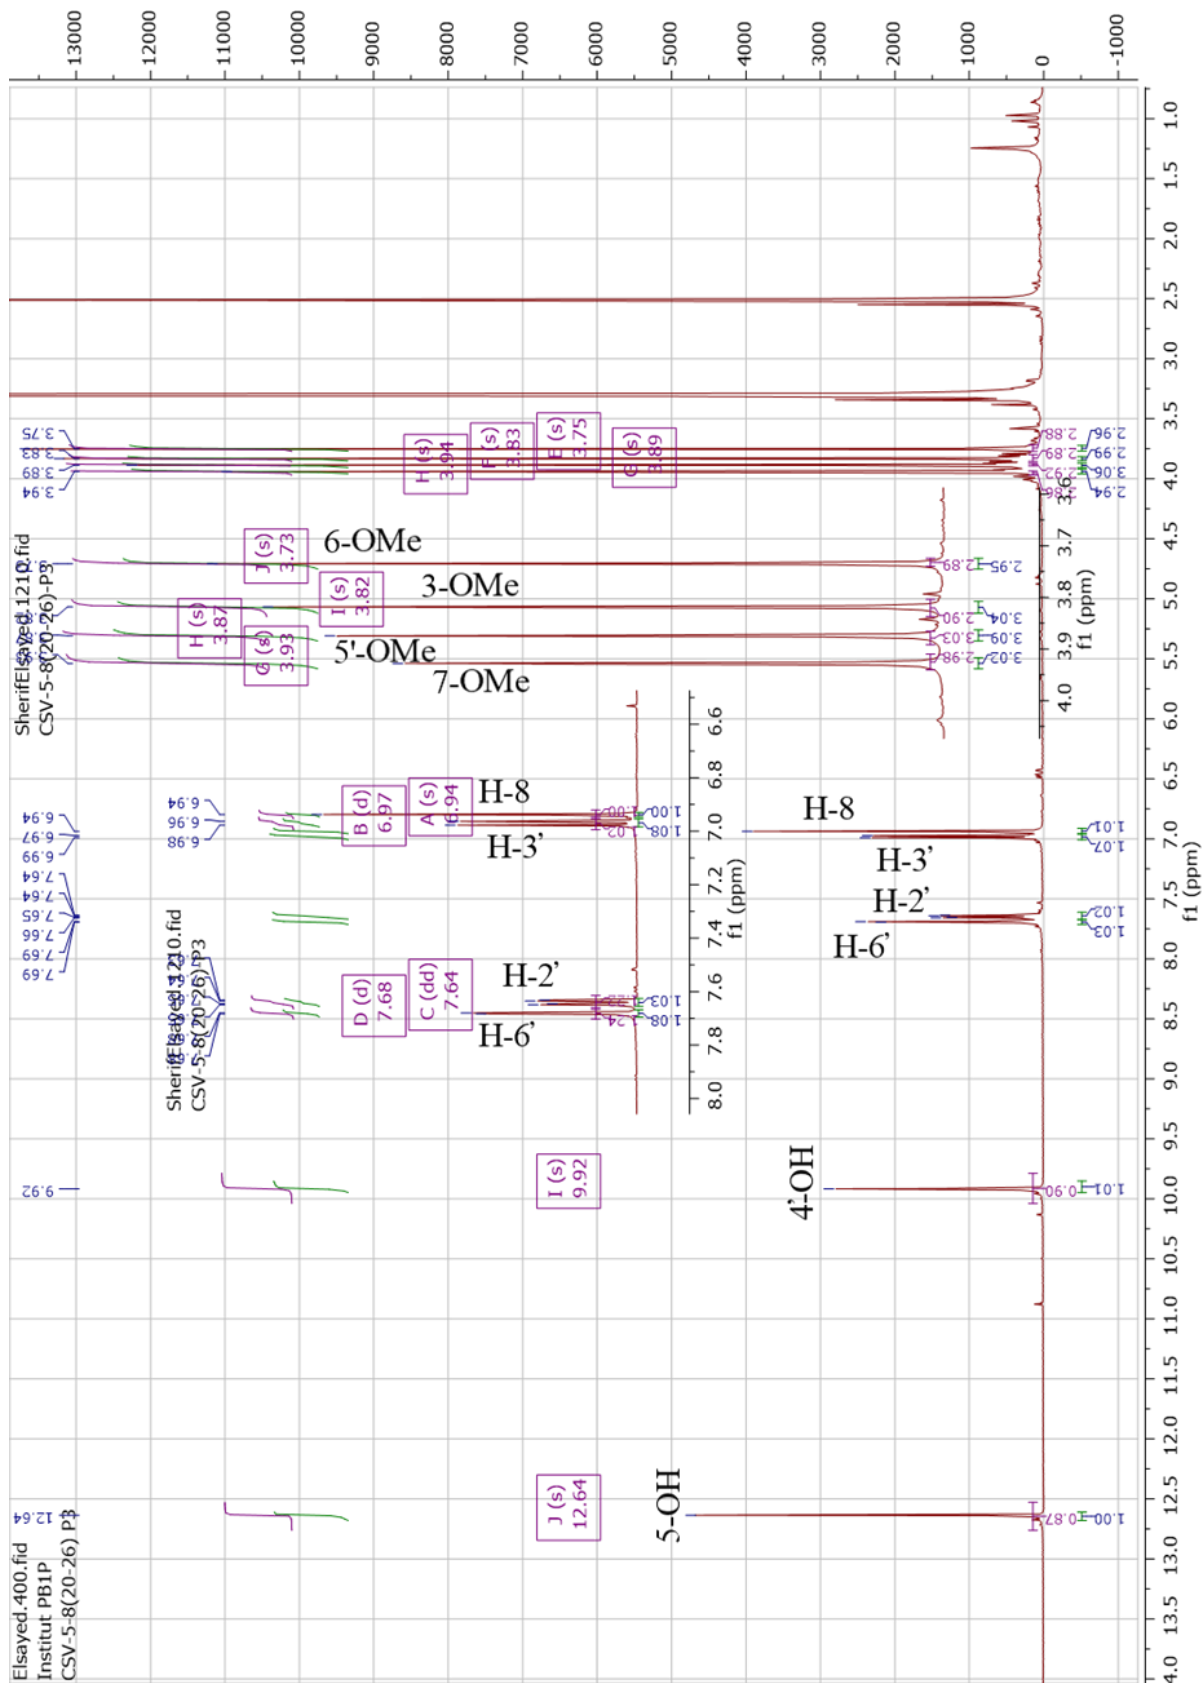

Figure S55.  $^1\text{H}$  NMR spectrum of **10** in  $\text{DMSO-}d_6$  at 600 MHz.

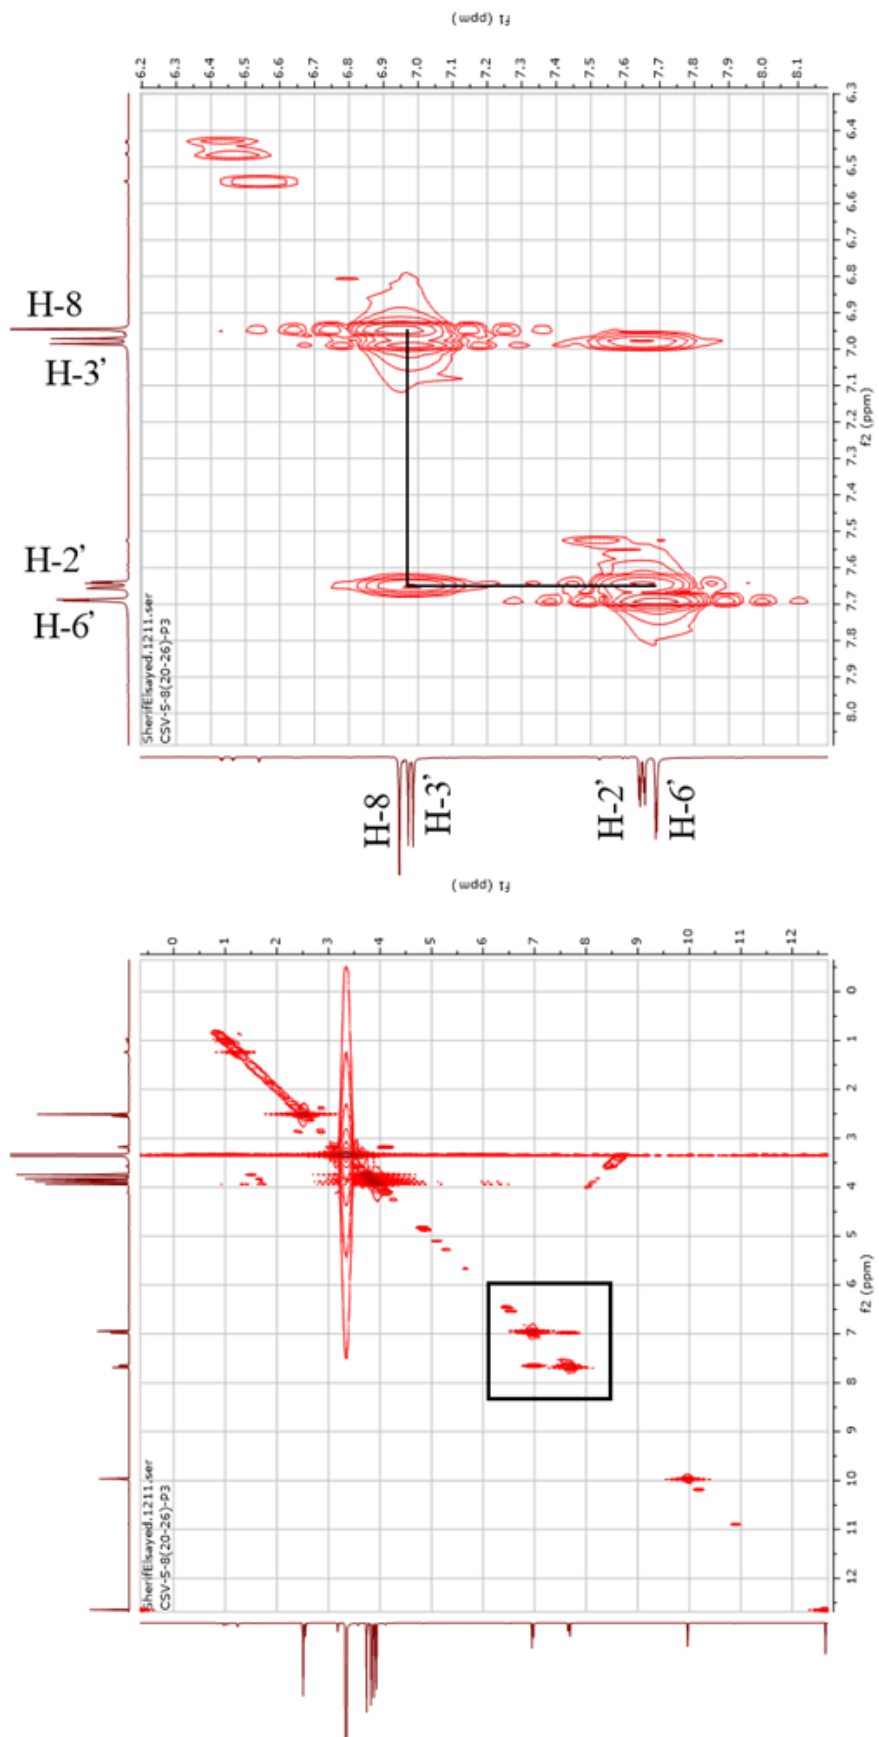

Figure S56.  $^1\text{H}$ - $^1\text{H}$  COSY spectrum of **10** in  $\text{DMSO-}d_6$  at 600 MHz.

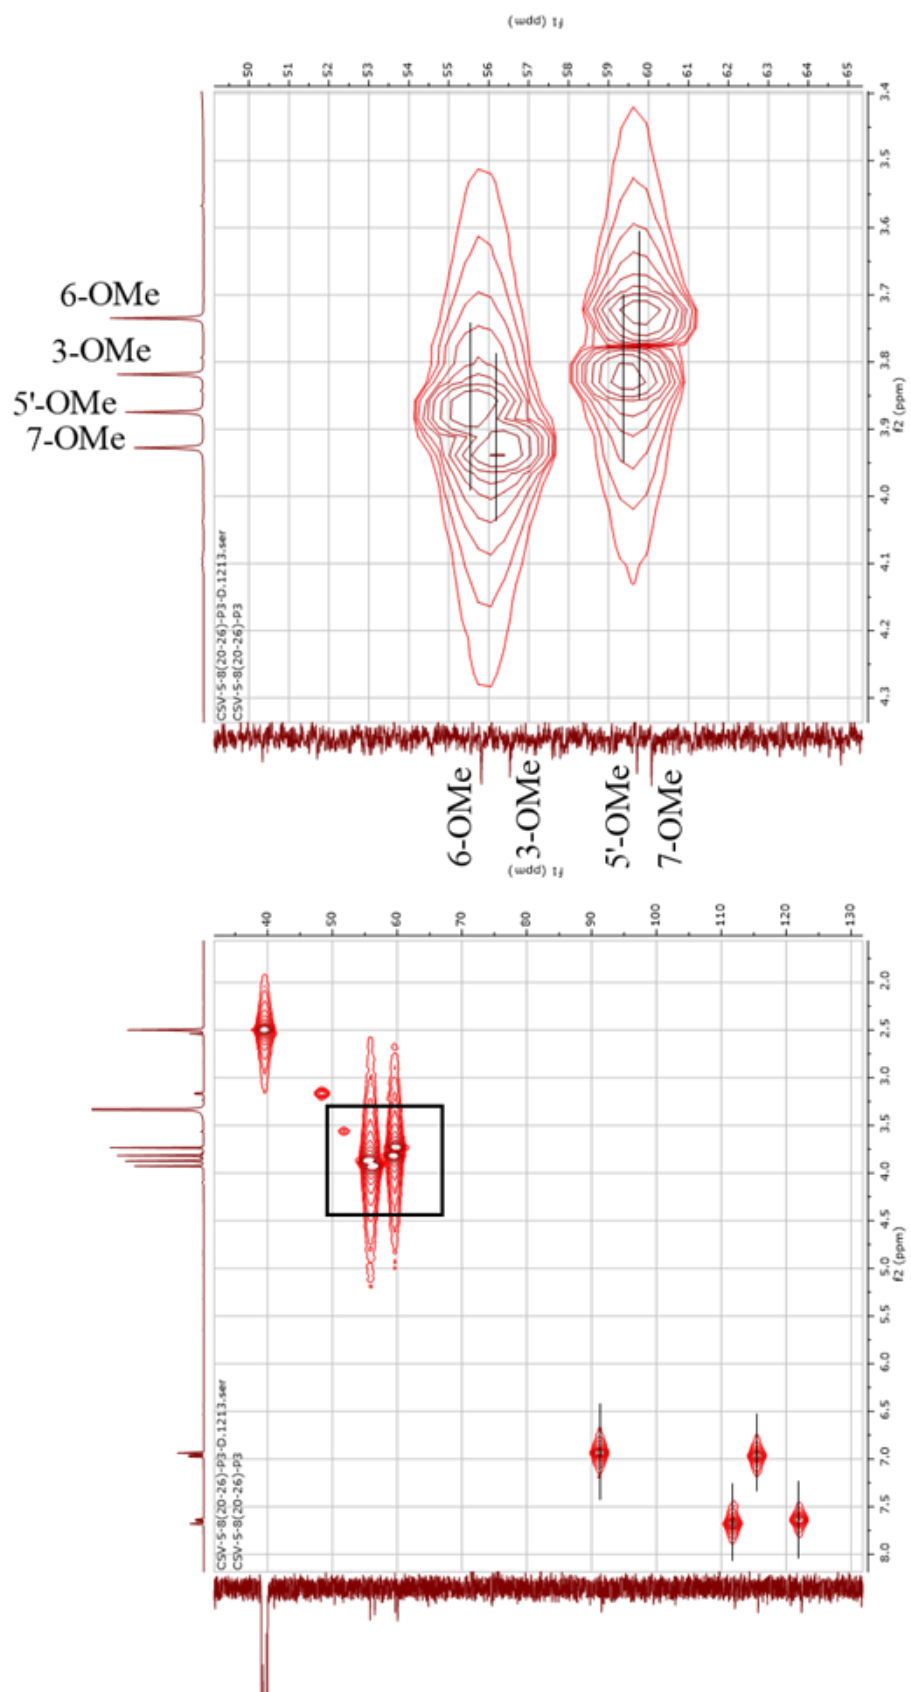

Figure S57. gHMBC spectrum of **10** in DMSO-*d*<sub>6</sub> at 600 MHz.

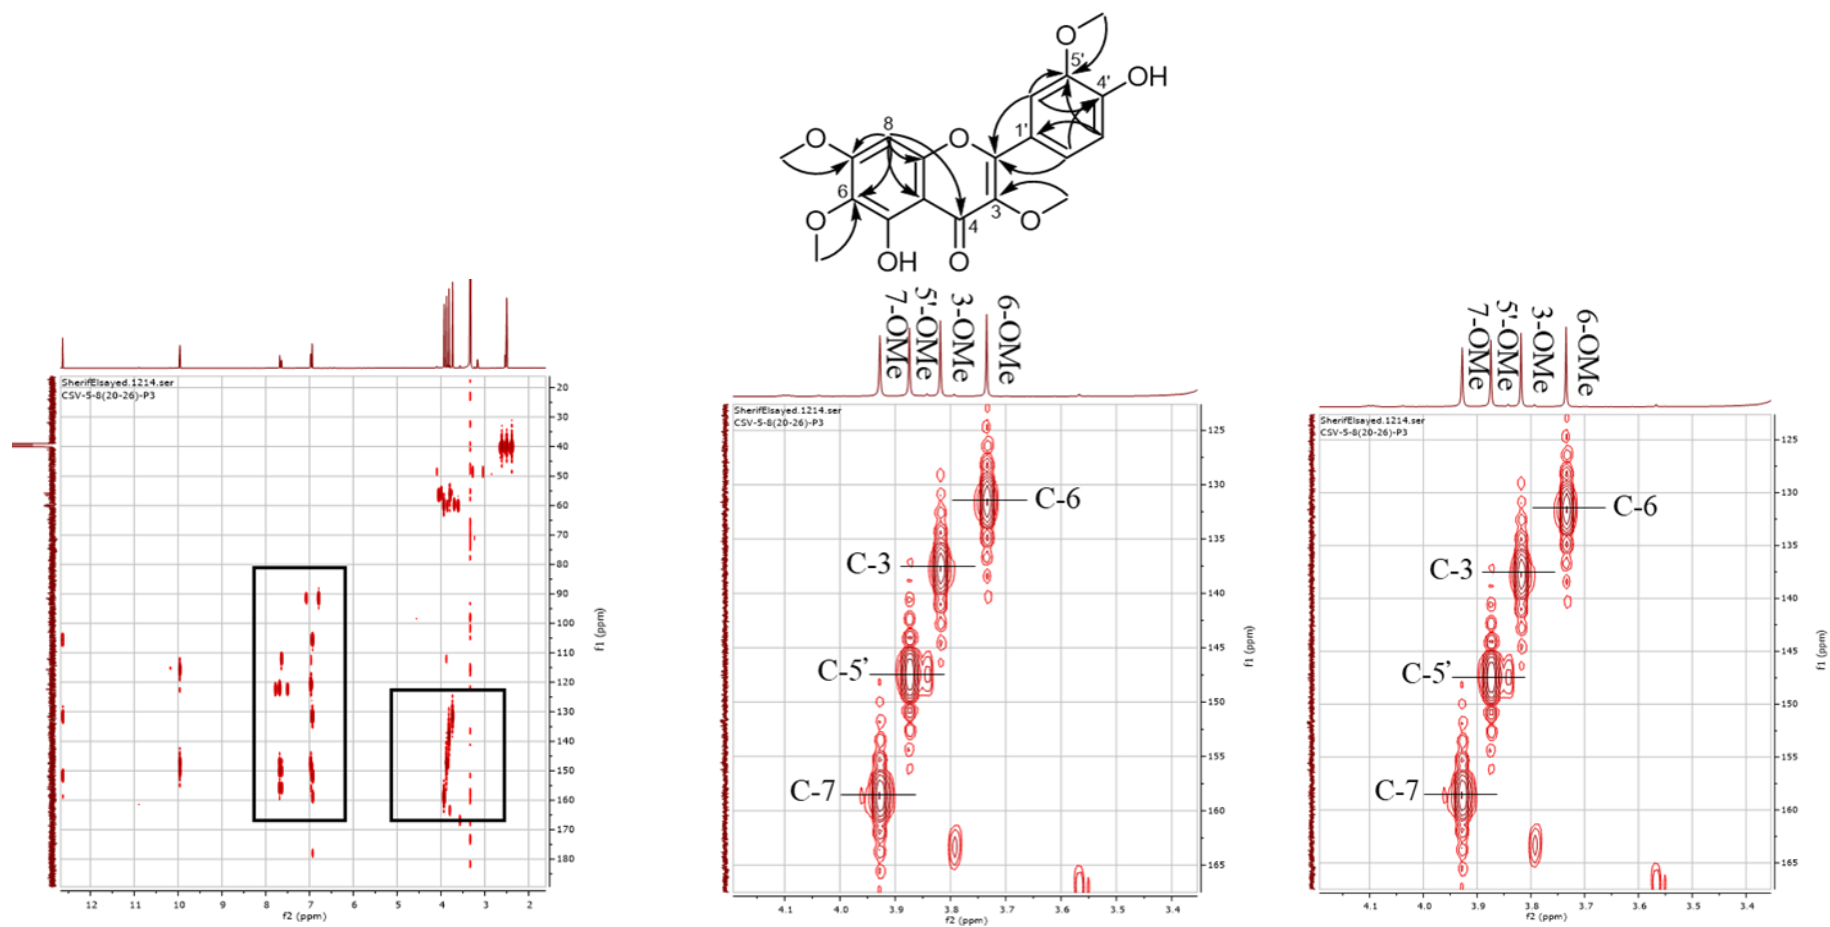

Figure S58. gHMBC spectrum of **10** in DMSO-*d*<sub>6</sub> at 600 MHz.

Table S2. Crystal data for chrysosplenetin (**10**).

|                                                         |                                                |
|---------------------------------------------------------|------------------------------------------------|
| CCDC number                                             | 1994762                                        |
| Empirical formula                                       | C <sub>19</sub> H <sub>18</sub> O <sub>8</sub> |
| M [g mol <sup>-1</sup> ]                                | 374.33                                         |
| Crystal size [mm <sup>3</sup> ]                         | 0.10 × 0.05 × 0.05                             |
| Temperature [K]                                         | 140                                            |
| θ range [°] (completeness)                              | 2.8–22.9                                       |
| h; k; l range                                           | ±9 ; -17 – 22 ; -17 – 16                       |
| Crystal system                                          | Monoclinic                                     |
| Space group                                             | P2 <sub>1</sub>                                |
| a [Å]                                                   | 7.2577(3)                                      |
| b [Å]                                                   | 17.3639(8)                                     |
| c [Å]                                                   | 13.3620(6)                                     |
| α [°]                                                   | 90                                             |
| β [°]                                                   | 95.789(2)                                      |
| γ [°]                                                   | 90                                             |
| V [Å <sup>3</sup> ]                                     | 1675.32(13)                                    |
| Z                                                       | 4                                              |
| D <sub>calc</sub> [mg m <sup>-3</sup> ]                 | 1.484                                          |
| μ (Cu Kα) [mm <sup>-1</sup> ]                           | 0.71073                                        |
| F(000)                                                  | 784                                            |
| Max./min. transmission                                  | 0.746 / 0.554                                  |
| Reflections collected                                   | 29961                                          |
| Independent reflect. (R <sub>int</sub> )                | 6958 (0.067)                                   |
| Data/restraints/parameters                              | 6958 / 1 / 512                                 |
| Max./min. Δρ [eÅ <sup>-3</sup> ] <sup>a</sup>           | 0.26 / -0.21                                   |
| R <sub>1</sub> /wR <sub>2</sub> [I>2σ(I)] <sup>b</sup>  | 0.048 / 0.111                                  |
| R <sub>1</sub> /wR <sub>2</sub> [all data] <sup>b</sup> | 0.048 / 0.111                                  |
| Goodness-of-fit on F <sup>2c</sup>                      | 1.04                                           |

<sup>a</sup> Largest difference peak and hole; <sup>b</sup>  $R_1 = [\sum(|F_o| - |F_c|)/\sum|F_o|]$ ;  $wR_2 = [\sum[w(F_o^2 - F_c^2)^2]/\sum[w(F_o^2)^2]]^{1/2}$ ; <sup>c</sup> Goodness-of-fit =  $[\sum[w(F_o^2 - F_c^2)^2]/(n - p)]^{1/2}$ ; <sup>d</sup> Absolute structure parameter.

Table S3. Fractional atomic coordinates and isotropic or equivalent isotropic displacement parameters ( $\text{\AA}^2$ ) for chrysosplenetin (**10**).

|      | <i>x</i>    | <i>y</i>     | <i>z</i>      | $U_{\text{iso}}^*/U_{\text{eq}}$ |
|------|-------------|--------------|---------------|----------------------------------|
| O1   | -0.0482 (3) | 0.54749 (14) | 0.05069 (17)  | 0.0238 (6)                       |
| C1'  | -0.1219 (5) | 0.4891 (2)   | -0.1053 (3)   | 0.0241 (8)                       |
| O2   | -0.1822 (4) | 0.34798 (16) | 0.0113 (2)    | 0.0324 (6)                       |
| C2   | -0.0993 (5) | 0.4791 (2)   | 0.0046 (3)    | 0.0228 (8)                       |
| C2'  | 0.0074 (5)  | 0.5360 (2)   | -0.1479 (3)   | 0.0240 (8)                       |
| H2'  | 0.102398    | 0.560930     | -0.105717     | 0.029*                           |
| O3   | -0.0645 (3) | 0.35133 (15) | 0.21771 (19)  | 0.0278 (6)                       |
| C3   | -0.1142 (5) | 0.4137 (2)   | 0.0585 (3)    | 0.0237 (8)                       |
| C3'  | -0.0030 (5) | 0.5459 (2)   | -0.2501 (3)   | 0.0242 (8)                       |
| O4   | 0.0599 (4)  | 0.42962 (16) | 0.3756 (2)    | 0.0262 (6)                       |
| C4   | -0.0612 (5) | 0.4118 (2)   | 0.1666 (3)    | 0.0213 (8)                       |
| C4'  | -0.1437 (5) | 0.5101 (2)   | -0.3133 (3)   | 0.0234 (8)                       |
| C4A  | 0.0011 (5)  | 0.4844 (2)   | 0.2104 (3)    | 0.0196 (7)                       |
| H4OO | 0.029 (7)   | 0.384 (4)    | 0.336 (4)     | 0.072 (17)*                      |
| O5   | 0.1443 (3)  | 0.56984 (15) | 0.45871 (17)  | 0.0234 (6)                       |
| C5   | 0.0569 (5)  | 0.4922 (2)   | 0.3151 (3)    | 0.0201 (7)                       |
| C5'  | -0.2731 (5) | 0.4653 (2)   | -0.2715 (3)   | 0.0284 (9)                       |
| H5'  | -0.370605   | 0.442164     | -0.313903     | 0.034*                           |
| O6   | 0.1627 (3)  | 0.69510 (14) | 0.33787 (18)  | 0.0239 (6)                       |
| C6   | 0.1072 (5)  | 0.5629 (2)   | 0.3553 (3)    | 0.0206 (7)                       |
| C6'  | -0.2624 (5) | 0.4537 (2)   | -0.1675 (3)   | 0.0282 (9)                       |
| H6'  | -0.350525   | 0.421841     | -0.139578     | 0.034*                           |
| O7   | 0.1158 (3)  | 0.59004 (16) | -0.29944 (19) | 0.0295 (6)                       |
| C7   | 0.1069 (5)  | 0.6280 (2)   | 0.2923 (3)    | 0.0203 (7)                       |
| O8   | -0.1576 (4) | 0.51940 (16) | -0.41541 (19) | 0.0292 (6)                       |
| C8   | 0.0553 (5)  | 0.6214 (2)   | 0.1901 (3)    | 0.0215 (8)                       |
| H8   | 0.056229    | 0.665044     | 0.147248      | 0.026*                           |
| C8A  | 0.0022 (5)  | 0.5500 (2)   | 0.1517 (3)    | 0.0196 (7)                       |
| H8O  | -0.053 (7)  | 0.537 (3)    | -0.432 (3)    | 0.049 (14)*                      |
| O9   | 0.3829 (3)  | 0.07816 (14) | 0.69962 (18)  | 0.0228 (5)                       |
| C9   | -0.0477 (6) | 0.2884 (3)   | 0.0061 (4)    | 0.0424 (11)                      |
| H9A  | 0.038913    | 0.302938     | -0.042361     | 0.064*                           |
| H9B  | -0.110217   | 0.240321     | -0.015479     | 0.064*                           |
| H9C  | 0.020333    | 0.281201     | 0.072576      | 0.064*                           |
| O10  | 0.5527 (4)  | 0.18252 (17) | 0.9235 (2)    | 0.0418 (8)                       |

|      |            |               |              |             |
|------|------------|---------------|--------------|-------------|
| C10  | 0.3375 (5) | 0.5780 (2)    | 0.4942 (3)   | 0.0293 (9)  |
| H10A | 0.407830   | 0.535548      | 0.468226     | 0.044*      |
| H10B | 0.352324   | 0.576892      | 0.567937     | 0.044*      |
| H10C | 0.383791   | 0.627122      | 0.470693     | 0.044*      |
| O11  | 0.6263 (4) | 0.03304 (17)  | 0.9813 (2)   | 0.0346 (7)  |
| C11  | 0.1492 (5) | 0.7628 (2)    | 0.2747 (3)   | 0.0265 (8)  |
| H11A | 0.229425   | 0.756735      | 0.220519     | 0.040*      |
| H11B | 0.188299   | 0.808158      | 0.315142     | 0.040*      |
| H11C | 0.020702   | 0.769543      | 0.245762     | 0.040*      |
| O12  | 0.6347 (4) | -0.11241 (17) | 0.9355 (2)   | 0.0296 (6)  |
| C12  | 0.2539 (6) | 0.6328 (3)    | -0.2389 (3)  | 0.0401 (11) |
| H12A | 0.321475   | 0.665781      | -0.282270    | 0.060*      |
| H12B | 0.340490   | 0.597126      | -0.201989    | 0.060*      |
| H12C | 0.194331   | 0.664873      | -0.191144    | 0.060*      |
| H12O | 0.656 (6)  | -0.063 (3)    | 0.976 (3)    | 0.042 (13)* |
| O13  | 0.5403 (4) | -0.22448 (15) | 0.79742 (19) | 0.0297 (6)  |
| C13' | 0.3559 (5) | 0.2116 (2)    | 0.7210 (3)   | 0.0225 (8)  |
| O14  | 0.3914 (4) | -0.18699 (15) | 0.61224 (19) | 0.0314 (6)  |
| C14  | 0.4174 (5) | 0.1374 (2)    | 0.7656 (3)   | 0.0224 (8)  |
| C14' | 0.2720 (5) | 0.2123 (2)    | 0.6213 (3)   | 0.0235 (8)  |
| H14' | 0.254346   | 0.165217      | 0.585329     | 0.028*      |
| O15  | 0.1296 (4) | 0.28740 (15)  | 0.47941 (19) | 0.0310 (6)  |
| C15  | 0.5023 (5) | 0.1231 (2)    | 0.8594 (3)   | 0.0257 (8)  |
| C15' | 0.2151 (5) | 0.2807 (2)    | 0.5752 (3)   | 0.0237 (8)  |
| O16  | 0.1946 (4) | 0.41885 (16)  | 0.5813 (2)   | 0.0324 (7)  |
| C16  | 0.5512 (5) | 0.0458 (2)    | 0.8937 (3)   | 0.0245 (8)  |
| C16' | 0.2432 (5) | 0.3506 (2)    | 0.6263 (3)   | 0.0242 (8)  |
| C16A | 0.5113 (5) | -0.0142 (2)   | 0.8213 (3)   | 0.0214 (8)  |
| H16O | 0.140 (6)  | 0.413 (3)     | 0.517 (4)    | 0.040 (13)* |
| C17  | 0.5538 (5) | -0.0926 (2)   | 0.8439 (3)   | 0.0228 (8)  |
| C17' | 0.3204 (5) | 0.3502 (2)    | 0.7247 (3)   | 0.0262 (8)  |
| H17' | 0.335651   | 0.397328      | 0.760805     | 0.031*      |
| C18  | 0.5131 (5) | -0.1486 (2)   | 0.7722 (3)   | 0.0241 (8)  |
| C18' | 0.3764 (5) | 0.2815 (2)    | 0.7718 (3)   | 0.0281 (8)  |
| H18' | 0.429574   | 0.282295      | 0.839736     | 0.034*      |
| C19  | 0.4299 (5) | -0.1272 (2)   | 0.6761 (3)   | 0.0248 (8)  |
| C20  | 0.3882 (5) | -0.0508 (2)   | 0.6518 (3)   | 0.0239 (8)  |
| H20  | 0.332903   | -0.036809     | 0.586881     | 0.029*      |

|      |            |             |            |             |
|------|------------|-------------|------------|-------------|
| C20A | 0.4300 (4) | 0.0035 (2)  | 0.7255 (3) | 0.0205 (8)  |
| C21  | 0.4351 (9) | 0.1903 (4)  | 1.0035 (4) | 0.075 (2)   |
| H21A | 0.306318   | 0.196745    | 0.974882   | 0.113*      |
| H21B | 0.473488   | 0.235435    | 1.044502   | 0.113*      |
| H21C | 0.445470   | 0.144035    | 1.045735   | 0.113*      |
| C22  | 0.6833 (6) | -0.2624 (3) | 0.7487 (3) | 0.0367 (10) |
| H22A | 0.645958   | -0.265685   | 0.676242   | 0.055*      |
| H22B | 0.702708   | -0.314371   | 0.776310   | 0.055*      |
| H22C | 0.798661   | -0.232927   | 0.760256   | 0.055*      |
| C23  | 0.3353 (6) | -0.1691 (3) | 0.5093 (3) | 0.0341 (10) |
| H23A | 0.427766   | -0.135487   | 0.483216   | 0.051*      |
| H23B | 0.215240   | -0.142873   | 0.504167   | 0.051*      |
| H23C | 0.324544   | -0.216833   | 0.469929   | 0.051*      |
| C24  | 0.0466 (6) | 0.2188 (2)  | 0.4338 (3) | 0.0320 (9)  |
| H24A | -0.023546  | 0.232089    | 0.369582   | 0.048*      |
| H24B | -0.036896  | 0.195898    | 0.478762   | 0.048*      |
| H24C | 0.144007   | 0.181749    | 0.421968   | 0.048*      |



Table S4. Atomic displacement parameters ( $\text{\AA}^2$ ) for chrysosplenetin (**10**).

|      | $U^{11}$    | $U^{22}$    | $U^{33}$    | $U^{12}$     | $U^{13}$     | $U^{23}$     |
|------|-------------|-------------|-------------|--------------|--------------|--------------|
| O1   | 0.0351 (14) | 0.0219 (13) | 0.0138 (13) | -0.0051 (11) | -0.0008 (10) | -0.0007 (10) |
| C1'  | 0.033 (2)   | 0.0229 (19) | 0.0165 (19) | 0.0000 (15)  | 0.0000 (15)  | -0.0009 (15) |
| O2   | 0.0409 (15) | 0.0254 (14) | 0.0297 (16) | -0.0045 (12) | -0.0029 (12) | -0.0063 (13) |
| C2   | 0.0254 (18) | 0.026 (2)   | 0.0165 (19) | -0.0028 (15) | -0.0010 (14) | -0.0030 (16) |
| C2'  | 0.0280 (18) | 0.0244 (19) | 0.019 (2)   | -0.0005 (14) | -0.0027 (14) | -0.0034 (16) |
| O3   | 0.0388 (15) | 0.0216 (14) | 0.0232 (15) | -0.0024 (12) | 0.0035 (11)  | 0.0024 (12)  |
| C3   | 0.0276 (18) | 0.025 (2)   | 0.018 (2)   | -0.0013 (15) | 0.0006 (14)  | -0.0035 (16) |
| C3'  | 0.0288 (19) | 0.0218 (19) | 0.022 (2)   | -0.0013 (14) | 0.0026 (15)  | 0.0018 (15)  |
| O4   | 0.0375 (15) | 0.0207 (14) | 0.0201 (15) | -0.0015 (11) | 0.0012 (11)  | 0.0026 (12)  |
| C4   | 0.0224 (17) | 0.0232 (19) | 0.019 (2)   | 0.0022 (14)  | 0.0058 (14)  | -0.0034 (16) |
| C4'  | 0.0284 (18) | 0.0246 (19) | 0.017 (2)   | 0.0009 (15)  | -0.0004 (14) | -0.0008 (15) |
| C4A  | 0.0214 (17) | 0.0205 (18) | 0.0168 (19) | 0.0004 (14)  | 0.0018 (14)  | -0.0029 (15) |
| O5   | 0.0274 (13) | 0.0290 (15) | 0.0136 (13) | -0.0020 (11) | 0.0009 (10)  | -0.0009 (11) |
| C5   | 0.0258 (18) | 0.0178 (18) | 0.0170 (19) | 0.0038 (14)  | 0.0034 (14)  | 0.0026 (15)  |
| C5'  | 0.031 (2)   | 0.032 (2)   | 0.021 (2)   | -0.0051 (16) | -0.0032 (16) | -0.0043 (17) |
| O6   | 0.0358 (14) | 0.0173 (13) | 0.0181 (14) | -0.0019 (11) | 0.0007 (10)  | 0.0011 (11)  |
| C6   | 0.0258 (17) | 0.0232 (19) | 0.0132 (19) | 0.0021 (14)  | 0.0032 (13)  | 0.0011 (15)  |
| C6'  | 0.0287 (19) | 0.031 (2)   | 0.024 (2)   | -0.0051 (16) | 0.0007 (16)  | -0.0023 (17) |
| O7   | 0.0339 (15) | 0.0340 (16) | 0.0201 (14) | -0.0120 (12) | -0.0001 (11) | -0.0022 (12) |
| C7   | 0.0239 (17) | 0.0210 (19) | 0.0162 (19) | -0.0014 (14) | 0.0027 (14)  | -0.0043 (15) |
| O8   | 0.0344 (16) | 0.0361 (16) | 0.0160 (15) | -0.0076 (13) | -0.0026 (11) | -0.0011 (12) |
| C8   | 0.0281 (18) | 0.0202 (18) | 0.016 (2)   | -0.0009 (14) | 0.0029 (14)  | 0.0025 (15)  |
| C8A  | 0.0214 (17) | 0.0252 (19) | 0.0124 (18) | 0.0016 (14)  | 0.0022 (13)  | -0.0027 (15) |
| O9   | 0.0279 (13) | 0.0200 (13) | 0.0197 (14) | 0.0006 (10)  | -0.0010 (10) | 0.0004 (11)  |
| C9   | 0.055 (3)   | 0.032 (2)   | 0.039 (3)   | 0.001 (2)    | 0.001 (2)    | -0.011 (2)   |
| O10  | 0.0586 (19) | 0.0288 (16) | 0.0338 (18) | 0.0098 (14)  | -0.0161 (14) | -0.0118 (13) |
| C10  | 0.0285 (19) | 0.038 (2)   | 0.021 (2)   | -0.0012 (17) | 0.0007 (15)  | 0.0001 (18)  |
| O11  | 0.0421 (16) | 0.0334 (17) | 0.0257 (16) | 0.0057 (12)  | -0.0094 (12) | -0.0027 (13) |
| C11  | 0.039 (2)   | 0.0181 (19) | 0.022 (2)   | -0.0046 (15) | -0.0015 (16) | 0.0013 (15)  |
| O12  | 0.0364 (15) | 0.0308 (16) | 0.0199 (15) | 0.0023 (12)  | -0.0052 (11) | 0.0022 (12)  |
| C12  | 0.044 (3)   | 0.046 (3)   | 0.029 (2)   | -0.021 (2)   | -0.0012 (19) | -0.001 (2)   |
| O13  | 0.0403 (15) | 0.0238 (15) | 0.0253 (15) | 0.0012 (12)  | 0.0054 (11)  | 0.0042 (12)  |
| C13' | 0.0190 (17) | 0.026 (2)   | 0.023 (2)   | -0.0012 (14) | 0.0023 (14)  | 0.0021 (16)  |
| O14  | 0.0490 (17) | 0.0213 (14) | 0.0229 (16) | -0.0045 (12) | -0.0015 (12) | -0.0002 (12) |
| C14  | 0.0197 (17) | 0.024 (2)   | 0.023 (2)   | -0.0004 (14) | 0.0033 (14)  | -0.0019 (16) |
| C14' | 0.0268 (19) | 0.0227 (19) | 0.021 (2)   | -0.0007 (15) | 0.0020 (15)  | 0.0002 (16)  |

|      |             |             |             |              |              |              |
|------|-------------|-------------|-------------|--------------|--------------|--------------|
| O15  | 0.0465 (16) | 0.0228 (14) | 0.0220 (15) | -0.0021 (12) | -0.0053 (12) | 0.0015 (12)  |
| C15  | 0.0267 (19) | 0.026 (2)   | 0.024 (2)   | -0.0009 (15) | -0.0017 (15) | -0.0086 (16) |
| C15' | 0.0265 (18) | 0.023 (2)   | 0.022 (2)   | -0.0030 (15) | 0.0026 (15)  | -0.0008 (16) |
| O16  | 0.0469 (17) | 0.0216 (15) | 0.0270 (17) | -0.0011 (12) | -0.0039 (13) | 0.0019 (13)  |
| C16  | 0.0228 (18) | 0.028 (2)   | 0.022 (2)   | 0.0039 (15)  | -0.0019 (15) | 0.0004 (16)  |
| C16' | 0.0260 (18) | 0.0195 (18) | 0.027 (2)   | -0.0005 (15) | 0.0032 (15)  | 0.0039 (17)  |
| C16A | 0.0210 (17) | 0.0238 (19) | 0.0189 (19) | -0.0006 (14) | 0.0003 (14)  | 0.0004 (15)  |
| C17  | 0.0217 (17) | 0.026 (2)   | 0.021 (2)   | -0.0003 (14) | 0.0021 (14)  | 0.0045 (16)  |
| C17' | 0.0259 (18) | 0.0237 (19) | 0.029 (2)   | -0.0035 (15) | 0.0008 (15)  | -0.0066 (17) |
| C18  | 0.0290 (18) | 0.0215 (19) | 0.022 (2)   | -0.0007 (15) | 0.0044 (15)  | 0.0058 (16)  |
| C18' | 0.0288 (19) | 0.029 (2)   | 0.025 (2)   | -0.0020 (16) | -0.0009 (15) | -0.0018 (18) |
| C19  | 0.0299 (19) | 0.024 (2)   | 0.020 (2)   | -0.0070 (15) | 0.0027 (15)  | -0.0021 (16) |
| C20  | 0.0283 (19) | 0.026 (2)   | 0.017 (2)   | -0.0020 (15) | 0.0015 (15)  | 0.0021 (16)  |
| C20A | 0.0202 (17) | 0.0222 (19) | 0.019 (2)   | 0.0004 (14)  | 0.0009 (14)  | 0.0051 (15)  |
| C21  | 0.129 (5)   | 0.071 (4)   | 0.024 (3)   | 0.050 (4)    | -0.003 (3)   | -0.014 (3)   |
| C22  | 0.037 (2)   | 0.032 (2)   | 0.041 (3)   | 0.0054 (18)  | 0.0051 (19)  | -0.0023 (19) |
| C23  | 0.045 (2)   | 0.032 (2)   | 0.023 (2)   | 0.0009 (18)  | -0.0052 (18) | -0.0022 (18) |
| C24  | 0.046 (2)   | 0.027 (2)   | 0.022 (2)   | -0.0055 (17) | -0.0015 (17) | 0.0021 (17)  |

Table S5. Geometric parameters (Å, °) for chrysosplenetin (**10**).

|         |           |           |           |
|---------|-----------|-----------|-----------|
| O1—C8A  | 1.364 (4) | C11—H11B  | 0.9800    |
| O1—C2   | 1.371 (4) | C11—H11C  | 0.9800    |
| C1'—C6' | 1.392 (5) | O12—C17   | 1.347 (4) |
| C1'—C2' | 1.406 (5) | O12—H12O  | 1.02 (5)  |
| C1'—C2  | 1.470 (5) | C12—H12A  | 0.9800    |
| O2—C3   | 1.372 (4) | C12—H12B  | 0.9800    |
| O2—C9   | 1.428 (5) | C12—H12C  | 0.9800    |
| C2—C3   | 1.356 (5) | O13—C18   | 1.369 (4) |
| C2'—C3' | 1.371 (5) | O13—C22   | 1.439 (5) |
| C2'—H2' | 0.9500    | C13'—C18' | 1.391 (5) |
| O3—C4   | 1.254 (4) | C13'—C14' | 1.408 (5) |
| C3—C4   | 1.457 (5) | C13'—C14  | 1.470 (5) |
| C3'—O7  | 1.371 (4) | O14—C19   | 1.355 (4) |
| C3'—C4' | 1.402 (5) | O14—C23   | 1.428 (5) |
| O4—C5   | 1.353 (4) | C14—C15   | 1.363 (5) |
| O4—H4OO | 0.97 (6)  | C14'—C15' | 1.383 (5) |
| C4—C4A  | 1.444 (5) | C14'—H14' | 0.9500    |
| C4'—O8  | 1.367 (4) | O15—C15'  | 1.370 (4) |
| C4'—C5' | 1.380 (5) | O15—C24   | 1.442 (5) |
| C4A—C8A | 1.382 (5) | C15—C16   | 1.451 (5) |
| C4A—C5  | 1.423 (5) | C15'—C16' | 1.397 (5) |
| O5—C6   | 1.386 (4) | O16—C16'  | 1.360 (4) |
| O5—C10  | 1.442 (4) | O16—H16O  | 0.92 (5)  |
| C5—C6   | 1.375 (5) | C16—C16A  | 1.432 (5) |
| C5'—C6' | 1.398 (5) | C16'—C17' | 1.377 (5) |
| C5'—H5' | 0.9500    | C16A—C20A | 1.389 (5) |
| O6—C7   | 1.357 (4) | C16A—C17  | 1.421 (5) |
| O6—C11  | 1.445 (4) | C17—C18   | 1.377 (5) |
| C6—C7   | 1.410 (5) | C17'—C18' | 1.390 (5) |
| C6'—H6' | 0.9500    | C17'—H17' | 0.9500    |
| O7—C12  | 1.430 (4) | C18—C19   | 1.412 (5) |
| C7—C8   | 1.384 (5) | C18'—H18' | 0.9500    |
| O8—H8O  | 0.87 (5)  | C19—C20   | 1.391 (5) |
| C8—C8A  | 1.382 (5) | C20—C20A  | 1.376 (5) |
| C8—H8   | 0.9500    | C20—H20   | 0.9500    |
| O9—C14  | 1.361 (4) | C21—H21A  | 0.9800    |
| O9—C20A | 1.375 (4) | C21—H21B  | 0.9800    |

|             |           |                |           |
|-------------|-----------|----------------|-----------|
| C9—H9A      | 0.9800    | C21—H21C       | 0.9800    |
| C9—H9B      | 0.9800    | C22—H22A       | 0.9800    |
| C9—H9C      | 0.9800    | C22—H22B       | 0.9800    |
| O10—C15     | 1.368 (4) | C22—H22C       | 0.9800    |
| O10—C21     | 1.441 (6) | C23—H23A       | 0.9800    |
| C10—H10A    | 0.9800    | C23—H23B       | 0.9800    |
| C10—H10B    | 0.9800    | C23—H23C       | 0.9800    |
| C10—H10C    | 0.9800    | C24—H24A       | 0.9800    |
| O11—C16     | 1.260 (4) | C24—H24B       | 0.9800    |
| C11—H11A    | 0.9800    | C24—H24C       | 0.9800    |
|             |           |                |           |
| C8A—O1—C2   | 120.4 (3) | O7—C12—H12C    | 109.5     |
| C6'—C1'—C2' | 119.5 (3) | H12A—C12—H12C  | 109.5     |
| C6'—C1'—C2  | 123.1 (3) | H12B—C12—H12C  | 109.5     |
| C2'—C1'—C2  | 117.4 (3) | C18—O13—C22    | 114.9 (3) |
| C3—O2—C9    | 114.1 (3) | C18'—C13'—C14' | 118.0 (3) |
| C3—C2—O1    | 121.2 (3) | C18'—C13'—C14  | 123.6 (3) |
| C3—C2—C1'   | 128.5 (3) | C14'—C13'—C14  | 118.4 (3) |
| O1—C2—C1'   | 110.2 (3) | C19—O14—C23    | 117.4 (3) |
| C3'—C2'—C1' | 120.3 (3) | O9—C14—C15     | 119.6 (3) |
| C3'—C2'—H2' | 119.9     | O9—C14—C13'    | 111.8 (3) |
| C1'—C2'—H2' | 119.9     | C15—C14—C13'   | 128.6 (4) |
| C2—C3—O2    | 119.8 (3) | C15'—C14'—C13' | 120.6 (3) |
| C2—C3—C4    | 121.3 (3) | C15'—C14'—H14' | 119.7     |
| O2—C3—C4    | 119.0 (3) | C13'—C14'—H14' | 119.7     |
| C2'—C3'—O7  | 125.1 (3) | C15'—O15—C24   | 117.1 (3) |
| C2'—C3'—C4' | 120.5 (3) | C14—C15—O10    | 120.4 (4) |
| O7—C3'—C4'  | 114.4 (3) | C14—C15—C16    | 122.2 (3) |
| C5—O4—H4OO  | 110 (3)   | O10—C15—C16    | 117.3 (3) |
| O3—C4—C4A   | 122.2 (3) | O15—C15'—C14'  | 125.1 (3) |
| O3—C4—C3    | 122.8 (3) | O15—C15'—C16'  | 114.4 (3) |
| C4A—C4—C3   | 115.0 (3) | C14'—C15'—C16' | 120.5 (3) |
| O8—C4'—C5'  | 119.0 (3) | C16'—O16—H16O  | 113 (3)   |
| O8—C4'—C3'  | 121.7 (3) | O11—C16—C16A   | 122.7 (3) |
| C5'—C4'—C3' | 119.3 (3) | O11—C16—C15    | 121.7 (3) |
| C8A—C4A—C5  | 117.5 (3) | C16A—C16—C15   | 115.7 (3) |
| C8A—C4A—C4  | 120.6 (3) | O16—C16'—C17'  | 119.3 (3) |
| C5—C4A—C4   | 121.8 (3) | O16—C16'—C15'  | 121.5 (3) |

|               |           |                |           |
|---------------|-----------|----------------|-----------|
| C6—O5—C10     | 114.9 (3) | C17'—C16'—C15' | 119.2 (4) |
| O4—C5—C6      | 119.7 (3) | C20A—C16A—C17  | 118.2 (3) |
| O4—C5—C4A     | 119.8 (3) | C20A—C16A—C16  | 120.0 (3) |
| C6—C5—C4A     | 120.5 (3) | C17—C16A—C16   | 121.9 (3) |
| C4'—C5'—C6'   | 120.8 (3) | O12—C17—C18    | 119.7 (3) |
| C4'—C5'—H5'   | 119.6     | O12—C17—C16A   | 120.2 (3) |
| C6'—C5'—H5'   | 119.6     | C18—C17—C16A   | 120.1 (3) |
| C7—O6—C11     | 115.9 (3) | C16'—C17'—C18' | 120.6 (4) |
| C5—C6—O5      | 119.0 (3) | C16'—C17'—H17' | 119.7     |
| C5—C6—C7      | 119.9 (3) | C18'—C17'—H17' | 119.7     |
| O5—C6—C7      | 120.9 (3) | O13—C18—C17    | 119.5 (3) |
| C1'—C6'—C5'   | 119.6 (4) | O13—C18—C19    | 121.0 (3) |
| C1'—C6'—H6'   | 120.2     | C17—C18—C19    | 119.2 (3) |
| C5'—C6'—H6'   | 120.2     | C17'—C18'—C13' | 121.1 (3) |
| C3'—O7—C12    | 117.2 (3) | C17'—C18'—H18' | 119.5     |
| O6—C7—C8      | 123.6 (3) | C13'—C18'—H18' | 119.5     |
| O6—C7—C6      | 116.0 (3) | O14—C19—C20    | 123.8 (3) |
| C8—C7—C6      | 120.4 (3) | O14—C19—C18    | 114.4 (3) |
| C4'—O8—H8O    | 109 (3)   | C20—C19—C18    | 121.8 (3) |
| C8A—C8—C7     | 118.6 (3) | C20A—C20—C19   | 117.4 (3) |
| C8A—C8—H8     | 120.7     | C20A—C20—H20   | 121.3     |
| C7—C8—H8      | 120.7     | C19—C20—H20    | 121.3     |
| O1—C8A—C4A    | 121.3 (3) | O9—C20A—C20    | 115.8 (3) |
| O1—C8A—C8     | 115.6 (3) | O9—C20A—C16A   | 120.8 (3) |
| C4A—C8A—C8    | 123.1 (3) | C20—C20A—C16A  | 123.3 (3) |
| C14—O9—C20A   | 121.6 (3) | O10—C21—H21A   | 109.5     |
| O2—C9—H9A     | 109.5     | O10—C21—H21B   | 109.5     |
| O2—C9—H9B     | 109.5     | H21A—C21—H21B  | 109.5     |
| H9A—C9—H9B    | 109.5     | O10—C21—H21C   | 109.5     |
| O2—C9—H9C     | 109.5     | H21A—C21—H21C  | 109.5     |
| H9A—C9—H9C    | 109.5     | H21B—C21—H21C  | 109.5     |
| H9B—C9—H9C    | 109.5     | O13—C22—H22A   | 109.5     |
| C15—O10—C21   | 113.3 (4) | O13—C22—H22B   | 109.5     |
| O5—C10—H10A   | 109.5     | H22A—C22—H22B  | 109.5     |
| O5—C10—H10B   | 109.5     | O13—C22—H22C   | 109.5     |
| H10A—C10—H10B | 109.5     | H22A—C22—H22C  | 109.5     |
| O5—C10—H10C   | 109.5     | H22B—C22—H22C  | 109.5     |
| H10A—C10—H10C | 109.5     | O14—C23—H23A   | 109.5     |

|                 |            |                     |            |
|-----------------|------------|---------------------|------------|
| H10B—C10—H10C   | 109.5      | O14—C23—H23B        | 109.5      |
| O6—C11—H11A     | 109.5      | H23A—C23—H23B       | 109.5      |
| O6—C11—H11B     | 109.5      | O14—C23—H23C        | 109.5      |
| H11A—C11—H11B   | 109.5      | H23A—C23—H23C       | 109.5      |
| O6—C11—H11C     | 109.5      | H23B—C23—H23C       | 109.5      |
| H11A—C11—H11C   | 109.5      | O15—C24—H24A        | 109.5      |
| H11B—C11—H11C   | 109.5      | O15—C24—H24B        | 109.5      |
| C17—O12—H12O    | 107 (2)    | H24A—C24—H24B       | 109.5      |
| O7—C12—H12A     | 109.5      | O15—C24—H24C        | 109.5      |
| O7—C12—H12B     | 109.5      | H24A—C24—H24C       | 109.5      |
| H12A—C12—H12B   | 109.5      | H24B—C24—H24C       | 109.5      |
| C8A—O1—C2—C3    | 4.9 (5)    | C20A—O9—C14—C15     | 0.7 (5)    |
| C8A—O1—C2—C1'   | -172.1 (3) | C20A—O9—C14—C13'    | 179.7 (3)  |
| C6'—C1'—C2—C3   | 42.3 (6)   | C18'—C13'—C14—O9    | -179.3 (3) |
| C2'—C1'—C2—C3   | -136.8 (4) | C14'—C13'—C14—O9    | 0.5 (4)    |
| C6'—C1'—C2—O1   | -141.0 (4) | C18'—C13'—C14—C15   | -0.3 (6)   |
| C2'—C1'—C2—O1   | 39.9 (4)   | C14'—C13'—C14—C15   | 179.5 (3)  |
| C6'—C1'—C2'—C3' | -1.0 (6)   | C18'—C13'—C14'—C15' | 1.1 (5)    |
| C2—C1'—C2'—C3'  | 178.2 (3)  | C14—C13'—C14'—C15'  | -178.7 (3) |
| O1—C2—C3—O2     | 173.9 (3)  | O9—C14—C15—O10      | 174.2 (3)  |
| C1'—C2—C3—O2    | -9.7 (6)   | C13'—C14—C15—O10    | -4.6 (6)   |
| O1—C2—C3—C4     | -5.4 (5)   | O9—C14—C15—C16      | -2.6 (5)   |
| C1'—C2—C3—C4    | 171.0 (3)  | C13'—C14—C15—C16    | 178.5 (3)  |
| C9—O2—C3—C2     | 111.2 (4)  | C21—O10—C15—C14     | 106.1 (4)  |
| C9—O2—C3—C4     | -69.5 (4)  | C21—O10—C15—C16     | -76.9 (4)  |
| C1'—C2'—C3'—O7  | -179.9 (4) | C24—O15—C15'—C14'   | 18.3 (5)   |
| C1'—C2'—C3'—C4' | 0.7 (6)    | C24—O15—C15'—C16'   | -161.8 (3) |
| C2—C3—C4—O3     | -176.3 (3) | C13'—C14'—C15'—O15  | -178.8 (3) |
| O2—C3—C4—O3     | 4.4 (5)    | C13'—C14'—C15'—C16' | 1.2 (5)    |
| C2—C3—C4—C4A    | 1.9 (5)    | C14—C15—C16—O11     | -178.5 (3) |
| O2—C3—C4—C4A    | -177.4 (3) | O10—C15—C16—O11     | 4.5 (5)    |
| C2'—C3'—C4'—O8  | 179.6 (3)  | C14—C15—C16—C16A    | 2.4 (5)    |
| O7—C3'—C4'—O8   | 0.2 (5)    | O10—C15—C16—C16A    | -174.6 (3) |
| C2'—C3'—C4'—C5' | 0.6 (6)    | O15—C15'—C16'—O16   | -2.4 (5)   |
| O7—C3'—C4'—C5'  | -178.9 (3) | C14'—C15'—C16'—O16  | 177.5 (3)  |
| O3—C4—C4A—C8A   | -179.8 (3) | O15—C15'—C16'—C17'  | 177.1 (3)  |
| C3—C4—C4A—C8A   | 2.0 (4)    | C14'—C15'—C16'—C17' | -3.0 (5)   |

|                 |            |                     |            |
|-----------------|------------|---------------------|------------|
| O3—C4—C4A—C5    | -2.1 (5)   | O11—C16—C16A—C20A   | -179.3 (3) |
| C3—C4—C4A—C5    | 179.7 (3)  | C15—C16—C16A—C20A   | -0.3 (5)   |
| C8A—C4A—C5—O4   | -179.4 (3) | O11—C16—C16A—C17    | 0.2 (5)    |
| C4—C4A—C5—O4    | 2.9 (5)    | C15—C16—C16A—C17    | 179.2 (3)  |
| C8A—C4A—C5—C6   | 0.8 (5)    | C20A—C16A—C17—O12   | 179.2 (3)  |
| C4—C4A—C5—C6    | -176.9 (3) | C16—C16A—C17—O12    | -0.3 (5)   |
| O8—C4'—C5'—C6'  | 179.2 (3)  | C20A—C16A—C17—C18   | -0.5 (5)   |
| C3'—C4'—C5'—C6' | -1.7 (6)   | C16—C16A—C17—C18    | 180.0 (3)  |
| O4—C5—C6—O5     | -5.7 (5)   | O16—C16'—C17'—C18'  | -178.1 (3) |
| C4A—C5—C6—O5    | 174.1 (3)  | C15'—C16'—C17'—C18' | 2.4 (5)    |
| O4—C5—C6—C7     | 179.1 (3)  | C22—O13—C18—C17     | -113.7 (4) |
| C4A—C5—C6—C7    | -1.1 (5)   | C22—O13—C18—C19     | 71.5 (4)   |
| C10—O5—C6—C5    | 106.4 (4)  | O12—C17—C18—O13     | 5.8 (5)    |
| C10—O5—C6—C7    | -78.5 (4)  | C16A—C17—C18—O13    | -174.5 (3) |
| C2'—C1'—C6'—C5' | -0.1 (6)   | O12—C17—C18—C19     | -179.4 (3) |
| C2—C1'—C6'—C5'  | -179.2 (4) | C16A—C17—C18—C19    | 0.3 (5)    |
| C4'—C5'—C6'—C1' | 1.4 (6)    | C16'—C17'—C18'—C13' | 0.0 (5)    |
| C2'—C3'—O7—C12  | -4.1 (5)   | C14'—C13'—C18'—C17' | -1.7 (5)   |
| C4'—C3'—O7—C12  | 175.3 (3)  | C14—C13'—C18'—C17'  | 178.1 (3)  |
| C11—O6—C7—C8    | 5.7 (5)    | C23—O14—C19—C20     | 11.5 (5)   |
| C11—O6—C7—C6    | -175.6 (3) | C23—O14—C19—C18     | -170.1 (3) |
| C5—C6—C7—O6     | -178.5 (3) | O13—C18—C19—O14     | -3.5 (5)   |
| O5—C6—C7—O6     | 6.4 (5)    | C17—C18—C19—O14     | -178.3 (3) |
| C5—C6—C7—C8     | 0.3 (5)    | O13—C18—C19—C20     | 174.9 (3)  |
| O5—C6—C7—C8     | -174.8 (3) | C17—C18—C19—C20     | 0.1 (5)    |
| O6—C7—C8—C8A    | 179.4 (3)  | O14—C19—C20—C20A    | 177.9 (3)  |
| C6—C7—C8—C8A    | 0.8 (5)    | C18—C19—C20—C20A    | -0.4 (5)   |
| C2—O1—C8A—C4A   | -0.8 (5)   | C14—O9—C20A—C20     | -179.8 (3) |
| C2—O1—C8A—C8    | 178.6 (3)  | C14—O9—C20A—C16A    | 1.4 (4)    |
| C5—C4A—C8A—O1   | 179.6 (3)  | C19—C20—C20A—O9     | -178.5 (3) |
| C4—C4A—C8A—O1   | -2.6 (5)   | C19—C20—C20A—C16A   | 0.2 (5)    |
| C5—C4A—C8A—C8   | 0.3 (5)    | C17—C16A—C20A—O9    | 178.9 (3)  |
| C4—C4A—C8A—C8   | 178.0 (3)  | C16—C16A—C20A—O9    | -1.5 (5)   |
| C7—C8—C8A—O1    | 179.6 (3)  | C17—C16A—C20A—C20   | 0.2 (5)    |
| C7—C8—C8A—C4A   | -1.1 (5)   | C16—C16A—C20A—C20   | 179.8 (3)  |

Table S6. Hydrogen-bond geometry (Å, °) for chrysosplenetin (**10**).

| <i>D</i> —H... <i>A</i>  | <i>D</i> —H | H... <i>A</i> | <i>D</i> ... <i>A</i> | <i>D</i> —H... <i>A</i> |
|--------------------------|-------------|---------------|-----------------------|-------------------------|
| O4—<br>H4O...O3          | 0.97 (6)    | 1.75 (5)      | 2.594 (4)             | 144 (5)                 |
| O8—H8O...O5 <sup>i</sup> | 0.87 (5)    | 2.22 (5)      | 3.023 (4)             | 154 (4)                 |
| O8—H8O...O7              | 0.87 (5)    | 2.25 (5)      | 2.688 (3)             | 111 (4)                 |
| O12—<br>H12O...O11       | 1.02 (5)    | 1.68 (5)      | 2.601 (4)             | 148 (4)                 |
| O16—<br>H16O...O4        | 0.92 (5)    | 1.94 (5)      | 2.829 (4)             | 163 (4)                 |

Symmetry code: (i) *x*, *y*, *z*-1.
